# Supplementary material for: Prognostic Risk Assessment of HFpEF: A Study on Feature Selection and Prediction Model Optimization Based on Machine Learning
Source: Research Square preprint supplement (doi:10.21203/rs.3.rs-7253929/v1), 2025-09-09
Supplement: Supplementary file 1 [file 9c5e1105d00d723973695e56.docx]

Heart Failure Treatment Adherence Scale

Instructions for filling out the form: The following questions inquire about how you have been managing your heart failure treatment in the past month. Please check (√) the option that best fits your situation (only select one). There are no right or wrong answers, please answer truthfully. The numbers represent the following meanings: 1 No or very little time; 2 Some of the time; 3 Half of the time; 4 Most of the time; 5 All of the time.

| Number | Project | No or very little time | A small amount of time | Half the time | Most of the time | All time |
| --- | --- | --- | --- | --- | --- | --- |
| 1 | Purchase and take medication based on recommendations from friends, advertisements, or personal experience（-） | 1 | 2 | 3 | 4 | 5 |
| 2 | Medications prescribed by a doctor | 1 | 2 | 3 | 4 | 5 |
| 3 | Take the medication as prescribed by the doctor | 1 | 2 | 3 | 4 | 5 |
| 4 | Take medication as prescribed by the doctor | 1 | 2 | 3 | 4 | 5 |
| 5 | Take medication at the time intervals prescribed by the doctor | 1 | 2 | 3 | 4 | 5 |
| 6 | Forget to take medication（-） | 1 | 2 | 3 | 4 | 5 |
| 7 | Need family or friends to remind to take medication（-） | 1 | 2 | 3 | 4 | 5 |
| 8 | Forgetting to bring medication when going out for travel or leaving home（-） | 1 | 2 | 3 | 4 | 5 |
| 9 | Adjust the dosage of medication according to the severity of symptoms（-） | 1 | 2 | 3 | 4 | 5 |
| 10 | Stop medication on your own when feeling well（-） | 1 | 2 | 3 | 4 | 5 |
| 11 | Stop taking the medication on your own if you feel that the symptoms worsen after taking it（-） | 1 | 2 | 3 | 4 | 5 |
| 12 | Feeling the side effects of medication is hard to bear（-） | 1 | 2 | 3 | 4 | 5 |
| 13 | I feel like I need to take too many medications every day（-） | 1 | 2 | 3 | 4 | 5 |
| 14 | Pay attention to using less salt and soy sauce in your diet, and eat less or avoid overly salty foods, such as cured and processed products | 1 | 2 | 3 | 4 | 5 |
| 15 | Pay attention to reducing oil intake and avoid eating fatty meat in the diet | 1 | 2 | 3 | 4 | 5 |
| 16 | Pay attention to increasing the intake of fresh vegetables and fruits in the diet | 1 | 2 | 3 | 4 | 5 |
| 17 | Adhere to regular exercise: participate in recommended activities such as walking, brisk walking, jogging, ball games, swimming, fitness dance/aerobics, etc., exercising 3 to 5 times a week, with each session lasting more than 30 minutes | 1 | 2 | 3 | 4 | 5 |
| 18 | Follow the advice of not smoking or smoking less | 1 | 2 | 3 | 4 | 5 |
| 19 | Follow the advice to abstain from or limit alcohol consumption | 1 | 2 | 3 | 4 | 5 |
| 20 | Pay attention to controlling body weight | 1 | 2 | 3 | 4 | 5 |
| 21 | Try to participate in social activities and interact more with people | 1 | 2 | 3 | 4 | 5 |
| 22 | When encountering unhappy events, try to think positively and be more open-minded | 1 | 2 | 3 | 4 | 5 |
| 23 | Can use various methods to relieve mental stress, such as talking, watching TV, browsing the internet, deep breathing, meditation, etc | 1 | 2 | 3 | 4 | 5 |
| 24 | Ensure adequate sleep | 1 | 2 | 3 | 4 | 5 |
| 25 | Regular follow-up examinations as advised by medical staff | 1 | 2 | 3 | 4 | 5 |

（-）is a reverse scoring question

Reverse scoring is the more conformity, the lower the score

Medication adherence behavior (5 items, 1—5)

Adverse medication behavior (8 items, 6—13)

Daily life management behavior (10 items, 14—17, 20—25)

Tobacco and alcohol preference management behavior (2 items, 18 19)

The total score of this scale is 25 to 125 points. A total score of 101 to 125 points indicates good treatment compliance, 76 to 100 points indicates moderate treatment compliance, 51 to 75 points indicates poor treatment compliance, and 25 to 50 points indicates very poor treatment compliance.
