# Supplementary material for: Prognostic Risk Assessment of HFpEF: A Study on Feature Selection and Prediction Model Optimization Based on Machine Learning
Source: Research Square preprint supplement (doi:10.21203/rs.3.rs-7253929/v1), 2025-09-09
Supplement: Supplementary file 2 [file b4fded6d512adc585f6e49e1.xlsx]

## Sheet: Sheet1
group	ID	Gender: 1 for Female, 2 for Male	Age	Ethnicity	Length of Hospital Stay	ef	LVESD	LVEDD	LVPW	IVS	E/e	E/A	NTBNP	D-Dimer	WBC Count	Neutrophil Percentage	Lymphocyte Percentage	Monocyte Percentage	Eosinophil Percentage	Basophil Percentage	Neutrophil Count	Lymphocyte Count	Monocyte Count	SIRI	SII	Eosinophil Count	Basophil Count	RBCCount	Hemoglobin	Platelets	Body Temperature	Respiration Rate	Systolic Blood Pressure	Diastolic Blood Pressure	Pulse	BMI	Aspartate Transaminase/Alanine Transaminase Ratio	Albumin/Globulin Ratio	Alanine Aminotransferase	Aspartate Aminotransferase	Gamma-Glutamyltransferaseγ	Alkaline Phosphatase	Total Bilirubin	Direct Bilirubin	Indirect Bilirubin	GLU	BUN	URE	UA
1	1	1	80	1	6	62	35	24	9	9	11.1198	0.66	2640	0.55	5.87	0.78	0	0.07	0.03	0.01	4.6	0.63	0.41	2.88	1153.65	0.19	0.04	5.41	158	311	36.6	21	148	72	92	22.65	1.38	0.59	24	33	67	104	11.6	7.5	4.1	5.32	5.83	65.5	493
2	2	1	67	1	15	55	46.9	33.5	7.5	7.8	19.931	1	3718	0.48	2.78	0.69	0.2	0.07	0.01	0	1.93	0.63	0.19	0.71	297.16	0.02	0.01	3.21	97	98	36.3	22	117	62	68	15.69	1.46	1.24	13	19	32	181	23.7	6.3	17.4	5.56	13.61	87.2	423
1	3	1	65	1	10	72	41.7	24.7	8.1	7.2	18.973	0.64	1224	1.46	11.36	0.9	0	0.03	0	0	10.26	0.71	0.38	5.38	1791.89	0	0.01	3.73	124	204	36.4	20	90	67	87	25.78	1.79	1.07	14	25	53	96	10.9	3.7	7.2	7.64	3.83	38.6	266.6
2	4	2	85	1	10	50	54.4	40.6	6	5.7	16.6029	0.55	4321	2.75	4.42	0.56	0.2	0.15	0.03	0	2.48	1.14	0.64	1.52	278.46	0.15	0.01	4.54	128	163	36.6	20	164	74	74	19.37	1.35	1.32	20	27	23	48	10.3	2.1	8.2	5.93	16.1	140.6	518
1	5	2	81	1	4	69	38.7	24	10.3	11.8	10.7469	0.57	294	0.74	6.68	0.72	0.1	0.11	0.01	0	4.81	1.07	0.72	3.13	651.82	0.06	0.02	5.03	145	142	36.6	20	128	70	64	25.31	1.67	1.17	15	25	19	67	23.3	6.6	16.7	4.82	7.11	95.2	462
1	6	2	84	1	6	55	45	33	11	11	20.5028	1.7	688	0.4	5.6	0.7	0.1	0.08	0.02	0.01	3.9	1.06	0.47	1.62	643.87	0.13	0.04	5.28	175	102	36.3	19	145	68	78	23.48	3.22	1.14	9	29	82	116	23.5	6.7	16.8	5.8	5.48	76.1	494
1	7	2	54	1	15	65	49	36	12	12	21.2803	1.2	13574	2.01	7.05	0.78	0	0.04	0.01	0	5.53	1.19	0.25	1.05	562.29	0.06	0.02	4.01	121	369	36.4	17	204	105	60	23.87	1.94	0.97	17	33	30	140	12	0.5	11.5	6.14	11.95	182	475
1	8	1	84	1	4	75	40.2	22.7	7	8.2	15.4401	1.2	1500	1.31	5.56	0.54	0.3	0.08	0.04	0.01	3	1.84	0.45	0.62	171.2	0.21	0.06	3.51	105	246	36.6	17	135	74	71	24.44	1.89	1.14	9	17	23	67	4.9	0.4	4.5	10.22	7.72	97.2	279
1	9	1	53	1	5	56	55.7	39.3	7.9	8.5	14.1138	0.66	483	0.2	4.3	0.66	0.2	0.06	0.02	0	2.85	1.14	0.26	0.54	275	0.08	0.01	4.11	110	136	36.6	20	113	56	83	22.98	1.25	1.4	20	25	31	88	16.1	2.6	13.5	7.19	5.15	59.8	324
1	10	2	43	2	5	56	47	33	12	13	17.4191	0.57	3312	1.24	8.6	0.71	0.18	0.08	0.01	0.01	6.17	1.56	0.7	2.66	668.42	0.12	0.08	5.29	169	137	36.5	22	144	99	95	32.14	1.28	1.33	29	37	57	116	10.2	2.8	7.4	4.84	9.63	93.9	565
2	11	2	86	1	7	63	42	25	12	12	16.7165	0.5	1500	1.95	6.56	0.73	0.1	0.08	0.01	0	4.76	1.21	0.53	2.21	727.77	0.04	0.02	6.5	185	163	36.6	20	116	65	82	30.94	1.5	1.05	16	24	45	92	25.1	7.5	17.6	5.98	8.35	122.6	279
1	12	1	79	1	7	52	49	33	14	14	12.6935	0.55	1380	1.5	6.65	0.67	0.1	0.09	0.05	0.01	4.47	1.19	0.6	2.14	270.45	0.36	0.03	3.62	72	223	36.2	21	168	78	82	23.42	4.67	1.05	3	14	16	156	7	2.3	4.7	6.05	11.43	120.6	562
2	13	2	60	1	6	67	32.5	20.8	6.8	6.5	22.6664	0.72	102	0.02	8.03	0.73	0.1	0.08	0.01	0.01	5.83	1.47	0.63	2.63	551.27	0.06	0.04	4.89	139	221	36.5	22	168	100	124	15.58	0.92	1.5	38	35	16	79	10.8	3.1	7.7	5.66	3.76	59.1	282
1	14	1	79	1	6	65	43	28	13	13	17.3816	1.5	5400	2.33	5.79	0.66	0.2	0.08	0	0	3.82	1.48	0.46	1.08	335.54	0.01	0.02	3.74	130	181	36.5	20	140	80	80	25.69	2.44	0.98	9	22	22	68	11.8	3.7	8.1	5.12	3.23	48.4	217
1	15	1	66	1	5	55	46	34	9	9	7.2	1.6	1736	0.15	4.69	0.72	0.2	0.05	0.01	0.01	3.37	0.98	0.23	0.68	447.04	0.06	0.05	4.13	130	221	36.2	17	141	98	73	23.89	2.64	1.12	11	29	14	91	13.7	2.3	11.4	10.29	4.72	71.8	375
1	16	1	73	1	6	69	53	32.5	8.5	7.5	13.5112	2.1	5514	0.71	7.84	0.55	0.3	0.06	0.01	0.01	4.33	2.96	0.44	0.53	190.17	0.07	0.04	4.02	130	202	36.5	18	102	38	55	19.86	4.25	1.31	4	17	11	65	10.8	2	8.8	5.48	6.36	67.8	351
2	17	2	84	1	7	57	46.2	32.3	7.3	8.3	23.3491	0.76	2850	1.65	8.56	0.85	0	0.06	0.01	0.01	7.26	0.67	0.5	5.55	1982.96	0.06	0.07	6.51	183	178	36.3	20	112	72	85	16.47	2	1.18	13	26	18	69	30.1	9	21.1	12.52	10.72	86.1	495
2	18	1	82	1	12	57	44	31	12	12	13.0443	1.7	1140	1.41	11.43	0.84	0	0.08	0	0	9.64	0.82	0.96	11.42	811.17	0	0.01	2.15	69	127	36	11	104	55	60	19.52	2.67	1.26	9	24	28	53	9.2	2.8	6.4	20.31	19.9	153.5	391
1	19	2	57	1	4	62	54.6	36.1	12.2	11.4	28.5801	1.8	302	0.24	7.72	0.72	0.1	0.09	0.01	0	5.54	1.37	0.69	2.68	626.79	0.1	0.02	5.27	155	188	36.2	17	107	80	96	23.96	1.37	1.47	19	26	66	74	27.1	5.6	21.5	14.88	9.71	64.8	336
1	20	1	76	1	8	66	50	31.9	8.4	8.4	19.0265	0.59	187	0.32	6.45	0.67	0.2	0.1	0	0	4.34	1.41	0.66	1.92	489.4	0.02	0.02	5.44	159	177	36.6	20	144	72	75	28.03	1.19	1.31	21	25	84	81	16.4	1.9	14.5	12.73	16.33	157.7	439
2	21	2	87	1	9	61	43	25	9	9	21.5239	1.2	5400	1.9	1.71	0.72	0.2	0.07	0.01	0	1.23	0.35	0.12	0.55	295.2	0.01	0	2.38	84	34	36.1	17	121	55	89	22.85	1.81	0.75	16	29	22	81	44.9	11.8	33.1	6.37	7.49	80.9	357
1	22	2	54	1	12	61	57.9	38.7	11.8	12.5	26.7959	0.8	431	0.1	9.1	0.65	0.27	0.06	0.02	0.01	5.87	2.48	0.51	1.1	385.81	0.2	0.05	5.33	163	229	36.3	20	234	139	82	23.87	1.12	1.4	25	28	33	73	19.9	4.2	15.7	10.74	6.55	78.1	416
1	23	1	82	1	9	60	45	31	10	10	19.8485	2.2	1845	0.67	6.28	0.63	0.2	0.07	0.01	0.01	3.98	1.75	0.43	0.87	259.27	0.09	0.03	3.98	114	199	36.1	17	123	65	70	28.82	1.79	1.4	14	25	90	88	15.4	4.6	10.8	14.39	7.17	72	293
2	24	1	74	1	11	55	37	28	9	9	9.7929	1.2	2704	1.41	6.93	0.58	0.3	0.09	0.01	0.01	4	2.22	0.6	1.21	252.25	0.07	0.04	4.9	140	222	36.2	18	115	78	64	21.86	1.88	1.36	8	15	18	93	23.9	5.7	18.2	5.34	7.74	75.8	595
2	25	1	71	1	8	53	55	40	14	14	9.74038	0.67	16805	1.53	3.93	0.72	0.1	0.11	0	0	2.84	0.66	0.42	1.94	473.33	0.01	0	3.48	110	72	36.2	19	167	73	57	21.13	1.45	1.5	11	16	21	49	14.8	3.7	11.1	4.66	5.2	82.4	281
1	26	2	89	1	22	60	40.4	22.8	8.5	7.5	7.2	0.94	3663	1.65	7.6	0.7	0.1	0.09	0.06	0.01	5.35	1.13	0.68	3.11	681.77	0.42	0.05	4.72	144	249	36.6	20	135	78	90	21.6	1.47	1.42	15	22	59	87	17.9	4.8	13.1	5.54	8.13	128.5	391
2	27	2	79	1	11	64	40	27	12	13	25.0768	0.73	4528	2.22	4.82	0.52	0.3	0.11	0.03	0.01	2.49	1.65	0.51	0.9	276.16	0.13	0.04	6.52	183	158	36.3	21	131	78	89	18.83	1	1.05	21	21	45	84	21.9	5.9	16	6.36	9.66	78	469
2	28	2	67	1	8	62	46	36.9	9	9	16.5032	1.5	1712	0.26	2.8	0.69	0.1	0.1	0.02	0	1.94	0.53	0.27	1.12	662.53	0.06	0.01	4.84	181	50	36.5	23	107	65	84	24.86	2.63	1.38	8	21	11	81	60.7	15	45.7	9.03	7	62.6	453
2	29	2	66	1	9	60	45	30	14	15	16.4858	1.6	2200	0.31	7.21	0.76	0	0.05	0.02	0	5.47	1.13	0.38	1.97	789.04	0.16	0.02	4.76	163	100	36.3	21	152	89	89	46.17	1.29	1.18	14	18	21	77	36.5	8.6	27.9	16.5	7.4	88.9	466.4
1	30	1	83	1	8	65	37	23	9	9	29.3312	1.2	1382	4.87	5.5	0.81	0	0.08	0	0	4.44	0.6	0.45	3.22	902.8	0.01	0	4.02	122	177	36.4	25	152	78	79	22.61	2	1.04	15	30	97	131	19.3	7.6	11.7	5.79	3.83	56.5	171
2	31	2	37	1	13	50	62.7	47	16.6	16.9	21.6846	1.4	2000	1.04	4.2	0.68	0.2	0.05	0.04	0.01	2.82	0.93	0.21	0.77	282	0.17	0.04	3.39	93	211	36.5	16	184	125	99	29.78	1.33	1.21	24	32	52	83	17.4	4.3	13.1	4.8	22.1	536.6	635.9
2	32	2	82	1	6	58	43	34	12	13	15.2184	0.88	3881	1.96	9.57	0.63	0.2	0.13	0.04	0	5.99	1.94	1.25	3.99	419.92	0.36	0.03	3.74	136	173	36.5	24	85	48	56	19.39	4.2	0.65	5	21	39	104	17	3.5	13.5	4.54	14.1	122.2	520
2	33	2	70	1	6	54	57	41	8	8	11.6433	1.11	3000	1.76	11.92	0.69	0.1	0.11	0.04	0	8.24	1.95	1.25	5.41	667.65	0.43	0.05	4.83	158	262	36.3	16	121	82	103	23.79	0.76	1.13	51	39	115	73	14.9	6.5	8.4	12.03	8.6	100.3	464.1
2	34	2	69	1	9	52	51	37	12	14	17.061	0.8	1547	1.26	10.6	0.79	0.16	0.05	0	0	8.37	1.67	0.54	2.84	681.63	0.04	0.02	4.86	136	205	36.2	19	133	86	97	23.68	1.03	1.22	5	14	18	69	21.4	3.2	18.2	6.99	6.6	104.1	480
2	35	1	81	1	4	64	38	23	11	9	6.90252	0.55	2930	1.22	8.89	0.77	0	0.13	0	0	6.82	0.83	1.16	9.66	1380.43	0.04	0.04	6.32	168	188	36.3	20	128	68	126	35.18	1	1.13	22	22	15	78	17.5	4.2	13.3	8.86	6	55.6	311
2	36	1	62	1	5	73	32.2	19.1	12.2	11.8	13.7014	0.69	755	4.26	7.49	0.73	0.2	0.05	0.01	0	5.45	1.62	0.34	1.27	366.7	0.07	0.01	4.06	109	231	36.4	14	153	63	63	17.55	1.73	0.89	11	19	48	106	8.6	0.2	8.4	18.25	23.53	164	443
2	37	1	54	4	6	67	44	27.9	11.2	11.2	15.4379	1.45	780	0.17	3.2	0.41	0.4	0.07	0.09	0	1.33	1.36	0.23	0.35	141.8	0.3	0.01	4.77	145	167	36.4	17	125	84	62	18.17	2.44	1.33	9	22	19	57	10.2	1.9	8.3	6.81	5.1	56.1	222
2	38	2	64	1	6	52	59.7	45	10.1	11.2	8.36591	1.5	3747	1.92	5.03	0.76	0	0.05	0.01	0	3.81	0.92	0.26	1.21	343.73	0.03	0.01	3.94	83	169	36.7	20	168	88	63	23.91	1.44	1.28	18	26	51	100	20	6.3	13.7	7.57	7	82.3	276
2	39	1	79	1	5	55	47	35	11	11	17.3162	1	6535	2.56	13.57	0.43	0.5	0.04	0	0	5.85	7.09	0.6	0.63	134.49	0.01	0.02	5.7	163	137	36.3	20	134	65	84	22.69	2.17	1.06	12	26	44	43	19	4.6	14.4	10.07	9.9	86.6	517
2	40	2	66	1	4	50	54.7	40.6	10.5	17.6	12.27	0.8	4894	1.33	5.2	0.78	0	0.06	0.01	0	4.04	0.79	0.32	1.77	956.3	0.02	0.01	6.46	187	55	36.3	20	127	78	76	31.3	4.22	1.28	9	38	52	130	45	15.9	29.1	5.6	6.6	82.5	771
1	41	2	53	2	6	66	43	29	10	10	14.732	0.85	2202	1.95	4.5	0.75	0.18	0.05	0.02	0	3.36	0.8	0.23	0.86	718.2	0.07	0.01	8.26	171	145	36.3	19	123	78	91	27.64	0.82	1.71	38	31	58	68	41.4	18.5	22.6	4.67	3.53	53.6	274
1	42	2	91	1	6	78	45.7	24.3	8.5	8.5	18.7117	0.63	600	1.37	5.1	0.72	0.2	0.07	0	0	3.7	1.07	0.36	1.13	511.78	0	0	4.53	148	134	36.3	23	188	85	136	24.99	1.54	1.29	13	20	18	77	14.3	2.7	11.6	9.11	5.01	66.5	171
2	43	2	72	3	8	65	47.2	30.2	8.1	7.7	22.4274	0.8	203	1.15	5.71	0.7	0.2	0.06	0	0	4	1.33	0.36	1.21	511.28	0.01	0.01	5.66	170	118	36.2	20	150	98	125	23.47	2.88	1.29	16	46	161	188	28.6	12.3	16.3	5.61	6.68	87	482
2	44	2	70	1	8	65	50	35	9	9	14.7543	1.3	1120	1.2	4.2	0.57	0.2	0.13	0	0	2.37	1.2	0.56	1.24	339.7	0.01	0.01	5.76	172	121	36.6	20	128	81	79	23.58	1.63	1.16	19	31	149	77	17.1	4.2	12.9	6.39	6	67.2	255
1	45	2	87	1	3	68	40.6	25.5	7.4	6.8	22.2905	0.66	670	0.76	4.76	0.83	0	0.06	0	0	3.97	0.49	0.29	2.24	1328.73	0	0.01	5.56	164	101	36.1	21	143	63	91	19.33	2	0.91	11	22	19	36	10.3	2.1	8.2	12.03	17.93	195.5	365
1	46	2	64	1	5	56	48.3	34.3	14.8	16.2	19.3943	0.48	35000	0.71	4.87	0.69	0.2	0.1	0	0	3.35	1.03	0.47	1.42	247.18	0.01	0.01	2.57	76	83	36.2	20	111	66	85	23.96	2.5	1.01	8	20	68	146	14.5	3.1	11.4	5.14	19.53	899.6	300
1	47	1	50	1	6	52	59.5	43.4	8.8	9.1	18.3978	0.78	10940	6.07	3.93	0.56	0.2	0.05	0.1	0.01	2.2	1.1	0.19	0.27	190	0.39	0.05	2.74	95	119	36.2	19	135	83	87	17.93	1.83	0.89	24	44	11	101	6.5	1	5.5	4.96	15.88	207.7	512
1	48	1	95	1	6	72	34.6	20.6	7.9	6	15.9217	0.8	4000	4.69	8.6	0.74	0.15	0.11	0	0	6.35	1.31	0.92	4.35	683.47	0.01	0.01	4.47	141	228	38.1	19	159	83	102	26.67	1.32	1.03	19	25	16	103	15.5	3.9	11.6	6.56	6.33	53.2	281
1	49	1	61	1	9	69	41.7	25.8	12.5	12.5	18.9605	0.8	499	0.45	4.4	0.61	0.2	0.1	0.02	0.01	2.7	1.15	0.45	0.95	272.35	0.07	0.03	4.2	116	259	36.5	21	140	70	63	33.04	1.6	1.13	35	56	52	90	17.3	4.9	12.4	6.52	7.23	69.6	320.2
2	50	1	64	1	7	62	41.8	28.1	12.1	12.1	10.2995	0.73	421	0.18	6.28	0.64	0.2	0.08	0.02	0.01	4.01	1.65	0.47	1.27	379.13	0.11	0.04	5.19	156	267	36.2	22	132	76	82	24.14	1.2	1.25	15	18	22	102	8.9	2.2	6.7	5.09	4.5	61.5	178
2	51	2	88	1	13	53	48	33	13	13	17.6157	1.4	5848	1.41	1.8	0.81	0	0.03	0	0	1.41	0.29	0.05	0.37	972.41	0	0	6.36	200	116	36.6	17	110	53	48	23.96	1.92	1	12	23	42	75	19.1	4.9	14.2	10.47	15.95	117.4	422
1	52	2	73	1	9	68	59.4	36.3	9.8	7	21.2561	1.2	1243	0.51	4.34	0.78	0	0.11	0	0	3.37	0.49	0.47	3.12	811.55	0.01	0	3.8	118	68	36.6	18	119	71	60	22.08	2.83	1.3	6	17	55	62	16.6	4.7	11.9	6.6	13.07	183.6	442
2	53	1	83	1	9	63	51	34	11	11	16.0073	1	443	1.38	4.7	0.75	0.1	0.07	0	0.01	3.51	0.81	0.32	1.52	186.33	0.02	0.03	1.54	43	250	36.5	20	120	80	85	24.55	1.6	1.1	10	16	278	168	29.3	10.7	18.6	8.14	6.8	67.8	487
2	54	2	68	1	11	60	54	39	14	14	16.5217	0.88	1520	1.12	5.4	0.76	0	0.05	0.01	0	4.07	0.94	0.29	1.39	627.82	0.06	0.01	4.46	145	135	36.4	18	123	66	82	25.45	1.28	1.12	18	23	19	73	23.1	7.1	16	18.18	9.9	78.6	223.9
1	55	2	47	1	5	63	51.6	33.8	8.7	8	25.0112	1.1	848	0.93	4.15	0.41	0.4	0.15	0.01	0	1.72	1.77	0.61	0.48	96.2	0.04	0.01	3.7	99	116	36.5	23	162	77	112	26.19	1.36	1.07	14	19	58	134	32.1	14	18.1	7.54	7.23	43.3	401
1	56	1	76	1	10	68	43	26.7	8.3	8	20.5633	0.47	1636	1.13	6.69	0.78	0	0.1	0	0	5.18	0.85	0.65	3.85	1017.72	0	0.01	5.17	167	335	36.7	19	161	86	64	24.91	0.73	1.2	56	41	64	63	15.7	3.6	12.1	5.02	6.79	50.8	279
1	57	2	31	1	15	65	58.8	37.5	10.4	10.4	12.9392	1	1944	0.25	8	0.8	0.13	0.05	0.01	0	6.46	1.04	0.43	2.56	726.75	0.08	0.03	4.99	117	264	36.3	20	163	120	94	36.53	2.83	1.1	6	17	28	106	56.5	15	41.5	5.13	4.46	106.3	672
2	58	1	69	1	17	63	40	25	13	7	17.485	0.62	1783	1.83	24	0.94	0	0.03	0	0	23.27	0.83	0.61	17.23	2999.87	0	0.01	3.5	107	249	36.6	15	97	53	65	18.91	2	0.73	8	16	175	110	6.1	1.1	5	23.53	16.1	171.5	561
2	59	1	57	1	6	58	52.5	36.4	10	7.8	14.1329	0.92	107	0.12	5.02	0.63	0.2	0.07	0.01	0.01	3.16	1.44	0.33	0.85	179.94	0.06	0.03	3.29	82	192	36.2	15	105	96	78	26.86	1.25	1.11	20	25	36	100	9.5	1.3	8.2	4.4	6.16	76.7	445
2	60	2	50	3	4	53	42	31	13	14	14.5038	1.5	1806	0.18	5.3	0.68	0.1	0.08	0.04	0.01	3.65	1.03	0.42	1.62	676.84	0.23	0.04	7.48	191	117	36.8	18	108	69	68	27.25	1.55	1.37	11	17	49	94	30.4	5.4	25	6.21	6.47	55	386
2	61	2	68	2	6	58	55.2	38.2	8.3	7.2	19.864	0.59	127	1.12	5.1	0.69	0.2	0.07	0.03	0	3.52	1.09	0.36	1.29	416.59	0.15	0.01	4.25	129	167	36.5	19	181	114	76	27.82	0.92	1.21	13	12	13	99	8.4	1.6	6.8	6.91	7.03	78.7	383
2	62	1	80	1	2	58	48	33	10	10	25.2471	0.6	4510	2.57	5.8	0.74	0.2	0.04	0	0	4.32	1.24	0.23	0.93	456.39	0.01	0.01	4.36	131	66	36.5	24	131	66	139	31.79	2.2	1.13	5	11	14	100	20.5	5.5	15	6.19	24.6	151.8	816
1	63	2	50	1	8	50	43	28	13	13	15.536	1.4	6341	0.11	6.9	0.74	0.1	0.08	0	0.01	5.17	1.16	0.56	2.39	583.85	0.01	0.03	4.33	131	196	36.3	23	170	107	83	20.12	1.2	1.03	76	91	55	113	28.1	6.9	21.2	6.42	9.56	73	408
1	64	1	58	1	6	65	43	28	10	10	13.4527	0.8	13773	2.63	2.3	0.68	0.1	0.1	0.03	0	1.53	0.44	0.22	0.66	257.32	0.06	0.01	2.73	74	63	36.4	18	167	79	74	30.77	3.6	1.23	5	18	21	87	9.9	1.5	8.4	4.69	13.33	492.8	674
1	65	2	70	1	4	61	55.2	37.1	8.7	9.5	11.1077	1.26	565	0.23	3.9	0.42	0.46	0.09	0.03	0.01	1.62	1.78	0.36	0.22	134.7	0.11	0.02	4.58	148	104	36.3	19	126	68	116	30.72	2.36	1.19	11	26	70	103	19	5.4	13.6	8.83	5.21	66.7	288
2	66	1	82	1	6	67	46.1	28.9	11.7	12.1	23.1986	1.9	5144	0.35	5.5	0.66	0.1	0.13	0.03	0.01	3.62	0.96	0.72	2.85	497.75	0.16	0.04	4.41	132	90	36.4	21	118	58	82	27.63	1.92	1.16	13	25	46	108	25.5	4	21.5	13.4	9.1	103.1	642
1	67	2	48	1	5	58	46	40	12	12	22.1741	1.6	1196	0.75	8.09	0.78	0	0.05	0.04	0.01	6.35	1	0.42	2.56	971.55	0.28	0.04	5.22	153	160	36.5	20	146	102	102	27.29	1.23	1.59	22	27	242	97	61	15.3	45.7	4.03	4.43	97.5	503
2	68	2	80	1	7	65	49	32	12.6	12.2	15.5538	0.8	900	0.26	2.39	0.76	0	0.04	0.02	0	1.82	0.44	0.09	0.5	219.23	0.04	0	1.69	53	90	36.2	26	139	68	76	23.16	3	1.39	5	15	15	50	50	10.9	39.1	5.78	17.6	312.6	381
2	69	1	78	1	7	71	48	28.5	7.4	7.8	21.6883	0.68	111	2.86	3.22	0.65	0.2	0.1	0.01	0.01	2.09	0.76	0.31	0.98	346.5	0.04	0.02	3.77	126	125	36.3	18	135	72	68	21.06	0.8	1.29	35	28	28	75	12.7	3.1	9.6	4	9.16	69.6	321
1	70	2	66	1	2	56	46.7	32.8	7.3	7.3	11.8412	0.64	3046	0.35	8.11	0.74	0.1	0.04	0.03	0.01	6	1.51	0.35	1.28	520.53	0.22	0.04	4.2	131	196	36.2	23	121	85	104	19.68	1	1.46	18	18	61	101	12.7	2.9	9.8	7.5	4.23	73.7	429
1	71	2	58	1	4	60	46	30.3	7.1	8.3	13.4823	0.86	5719	14.42	3.4	0.52	0.3	0.1	0.02	0.01	1.81	1.23	0.34	0.39	148.63	0.06	0.05	4.53	101	108	36.7	20	117	95	43	19.01	2.25	1.49	12	27	15	66	20.5	6.1	14.4	5.26	6.07	66.2	292
2	72	1	76	1	7	57	59.7	41.4	8.7	9.9	9.81433	1.2	1697	1.46	8.17	0.68	0.2	0.08	0.03	0.01	5.59	1.7	0.61	2.14	434.05	0.21	0.06	5.2	132	246	36.1	20	98	53	77	30.25	1.11	1.23	18	20	19	95	15.3	5.2	10.1	7.97	7.4	102.2	480.3
2	73	1	76	1	4	65	43	25	12	12	22.7175	0.88	708	1.87	10.37	0.74	0.1	0.07	0.01	0	7.68	1.89	0.69	2.93	585.14	0.07	0.04	5.01	144	261	36	20	141	67	110	21.9	1.78	1.59	9	16	22	81	13.2	2	11.2	8.52	20.3	141.2	470
1	74	2	55	1	8	66	49.1	31	7.7	8	14.7174	0.7	1480	0.96	8.76	0.73	0.1	0.07	0.03	0.01	6.39	1.43	0.6	2.57	563.03	0.29	0.05	4.13	126	242	36.2	19	170	92	119	20.54	1.04	0.97	26	27	175	117	9.3	2.3	7	9.09	13.7	248	462
1	75	1	75	1	10	57	42	27	13	13	7.2	1.5	6651	1.33	8.75	0.86	0	0.05	0	0.01	7.49	0.81	0.4	3.59	1128.12	0.01	0.04	3.91	122	202	36.3	18	125	70	76	26.33	0.75	1.06	28	21	32	77	63	8.7	54.3	9.77	8.13	80.9	291.3
2	76	2	86	1	8	52	40	30	12	12	14.2142	1	6746	1.54	5.85	0.82	0	0.07	0	0.01	4.81	0.57	0.42	3.67	1510.51	0.02	0.03	6.21	179	83	36.1	21	120	75	91	23.43	1.57	1.15	30	47	32	84	34.6	10.3	24.3	8.74	10.7	96.2	405
1	77	2	59	1	7	60	47.8	32.6	8.2	8.2	13.3573	0.51	3366	0.6	5.45	0.47	0.4	0.1	0.02	0	2.57	2.22	0.56	0.54	185.23	0.08	0.02	5.18	160	282	36.3	18	124	77	81	19.17	1.79	1.38	19	34	22	81	14.1	5.6	8.5	6.43	4.93	51.2	298.7
2	78	1	80	1	8	56	44	30	13	14	20.1926	0.79	375	1.53	5.19	0.52	0.3	0.1	0.02	0.01	2.67	1.85	0.52	0.88	190.51	0.11	0.04	4.11	132	185	36.2	20	137	72	82	21.28	1.43	1.19	37	53	23	103	26.2	16.8	9.4	4.59	9.6	88.3	540.5
1	79	2	70	1	4	66	45	28	9.6	9.1	9.83356	0.54	203	0.8	9.03	0.73	0.1	0.08	0	0	6.54	1.7	0.74	2.74	569.36	0.03	0.02	4.76	148	181	36.3	17	109	71	93	27.25	1.62	1.51	13	21	22	77	42	6.6	35.4	5.07	11.43	105.9	411
1	80	2	58	1	9	60	40	28	13	13	19.8906	0.79	5685	1.79	10.9	0.8	0	0.11	0	0	8.52	0.86	1.19	11.68	931.26	0.01	0.01	3.93	94	63	36.4	21	181	107	111	21.99	1.12	0.9	280	314	78	145	60.8	23.1	37.7	5.08	7.63	72.3	478
2	81	2	72	1	13	77	41.3	22.8	9.5	6	24.4057	0.8	5543	0.41	7.07	0.57	0.2	0.16	0.04	0	4.05	1.55	1.16	3.16	279.58	0.29	0.02	3.53	107	167	36.6	17	110	65	72	26.28	2.5	1.33	10	25	13	62	22.3	5.7	16.6	7.82	11.16	122.3	297
2	82	1	84	1	5	50	58.4	43.5	5.2	8	21.2422	0.75	2877	1.42	6.8	0.65	0.2	0.07	0.02	0.01	4.45	1.71	0.51	1.46	445	0.15	0.05	6.16	171	218	36.2	20	137	84	96	24.01	1.67	1	18	30	23	83	16.9	1.9	15	12.5	10.9	113.7	540
2	83	1	82	1	7	59	43.4	29.9	7.8	7.8	22.9787	0.76	5514	1.18	3.7	0.81	0	0.07	0.02	0	2.98	0.38	0.24	2.01	1442.95	0.08	0.01	6.01	184	68	36.6	22	138	91	114	30.66	0.92	1.12	13	12	28	83	8.3	5.1	3.2	14.71	13	146.3	635.7
1	84	2	62	1	7	65	49	32	12.6	12.2	20.6682	0.8	900	0.26	2.39	0.76	0	0.04	0.02	0	1.82	0.44	0.09	0.26	219.23	0.04	0	1.69	53	90	36.2	26	139	68	76	23.66	3	1.39	5	15	15	50	50	10.9	39.1	5.39	16.33	308.2	366
1	85	2	75	1	7	71	48	28.5	7.4	7.8	8.27904	0.68	111	2.36	3.22	0.65	0.2	0.1	0.01	0.01	2.09	0.76	0.31	0.74	346.5	0.04	0.02	3.77	126	125	36.3	18	135	72	68	21.56	0.8	1.29	35	28	28	75	12.7	3.1	9.6	3.61	7.89	65.2	306
2	86	2	65	1	2	56	46.7	32.8	7.3	7.3	6.7	0.64	3046	0.35	8.11	0.74	0.1	0.04	0.03	0.01	6	1.51	0.35	1.52	520.53	0.22	0.04	4.2	131	196	36.2	23	121	85	104	19.18	1	1.46	18	18	61	101	12.7	2.9	9.8	7.89	5.5	78.1	444
2	87	1	72	1	4	60	46	30.3	7.1	8.3	9.2965	0.86	5719	14.92	3.4	0.52	0.3	0.1	0.02	0.01	1.81	1.23	0.34	0.63	148.63	0.06	0.05	4.53	101	108	36.7	20	117	95	43	18.51	2.25	1.49	12	27	15	66	20.5	6.1	14.4	5.65	7.34	70.6	307
1	88	2	61	1	7	57	59.7	41.4	8.7	9.9	15.1291	1.2	1697	0.96	8.17	0.68	0.2	0.08	0.03	0.01	5.59	1.7	0.61	1.9	434.05	0.21	0.06	5.2	132	246	36.1	20	98	53	77	30.75	1.11	1.23	18	20	19	95	15.3	5.2	10.1	7.58	6.13	97.8	465.3
1	89	1	78	1	4	65	43	25	12	12	10.9158	0.88	708	1.37	10.37	0.74	0.1	0.07	0.01	0	7.68	1.89	0.69	2.69	585.14	0.07	0.04	5.01	144	261	36	20	141	67	110	22.4	1.78	1.59	9	16	22	81	13.2	2	11.2	8.13	19.03	136.8	455
1	90	1	81	1	10	57	42	27	13	13	17.3541	1.5	6651	1.33	8.75	0.86	0	0.05	0	0.01	7.49	0.81	0.4	3.59	1128.12	0.01	0.04	3.91	122	202	36.3	18	125	70	76	26.33	0.75	1.06	28	21	32	77	63	8.7	54.3	9.77	8.13	80.9	291.3
1	91	2	85	1	8	52	40	30	12	12	7.2	1	6746	1.04	5.85	0.82	0	0.07	0	0.01	4.81	0.57	0.42	3.43	1510.51	0.02	0.03	6.21	179	83	36.1	21	120	75	91	23.93	1.57	1.15	30	47	32	84	34.6	10.3	24.3	8.35	9.43	91.8	390
2	92	1	75	1	7	60	47.8	32.6	8.2	8.2	19.4981	0.51	3366	1.1	5.45	0.47	0.4	0.1	0.02	0	2.57	2.22	0.56	0.78	185.23	0.08	0.02	5.18	160	282	36.3	18	124	77	81	18.67	1.79	1.38	19	34	22	81	14.1	5.6	8.5	6.82	6.2	55.6	313.7
1	93	1	84	1	4	51	49	36	8.4	10.3	9.46237	0.72	2115	0.34	3.6	0.83	0	0.06	0.01	0	3.08	0.38	0.24	1.84	826.74	0.02	0.01	3.61	102	63	36.3	17	110	50	49	19.77	2.07	1.32	14	29	46	71	20.5	6.8	13.7	7	9.43	79.4	407
1	94	1	68	1	8	56	44	30	13	14	19.179	0.79	375	1.03	5.19	0.52	0.3	0.1	0.02	0.01	2.67	1.85	0.52	0.64	190.51	0.11	0.04	4.11	132	185	36.2	20	137	72	82	21.78	1.43	1.19	37	53	23	103	26.2	16.8	9.4	4.2	8.33	83.9	525.5
1	95	2	83	1	9	60	40	28	13	13	17.6685	0.79	5685	1.79	10.9	0.8	0	0.11	0	0	8.52	0.86	1.19	11.68	931.26	0.01	0.01	3.93	94	63	36.4	21	181	107	111	21.99	1.12	0.9	280	314	78	145	60.8	23.1	37.7	5.08	7.63	72.3	478
1	96	1	85	1	13	77	41.3	22.8	9.5	6	13.9667	0.8	5543	0.41	7.07	0.57	0.2	0.16	0.04	0	4.05	1.55	1.16	2.92	279.58	0.29	0.02	3.53	107	167	36.6	17	110	65	72	26.78	2.5	1.33	10	25	13	62	22.3	5.7	16.6	7.43	9.89	117.9	282
1	97	2	78	1	9	59	42	29	7.2	8.3	17.614	0.75	1266	2.4	2.27	0.87	0	0.05	0.01	0	1.97	0.16	0.11	1.24	763.38	0.03	0	1.59	62	20	36.7	27	149	107	117	21.74	1.93	1.39	14	27	8	45	73.1	10.4	62.7	6.37	6.93	83.7	281.5
1	98	2	68	1	5	50	58.4	43.5	5.2	8	19.5742	0.75	2877	0.92	6.8	0.65	0.2	0.07	0.02	0.01	4.45	1.71	0.51	1.22	445	0.15	0.05	6.16	171	218	36.2	20	137	84	96	24.51	1.67	1	18	30	23	83	16.9	1.9	15	12.11	9.63	109.3	525
1	99	2	64	1	7	59	43.4	29.9	7.8	7.8	11.2083	0.76	5514	0.68	3.7	0.81	0	0.07	0.02	0	2.98	0.38	0.24	1.77	1442.95	0.08	0.01	6.01	184	68	36.6	22	138	91	114	31.16	0.92	1.12	13	12	28	83	8.3	5.1	3.2	14.32	11.73	141.9	620.7
2	100	2	91	1	6	55	43	28	12	13	11.2907	1.4	983	2.48	5	0.79	0.11	0.09	0	0.01	3.97	0.57	0.46	3.33	794	0.01	0.03	5.31	114	104	36.4	20	150	78	84	25.63	1.8	1.16	15	27	42	69	15.4	4.4	11	6.83	15.69	175.5	679
2	101	1	78	1	8	66	32	20	7.6	8.1	13.2647	1.1	5978	1.46	4.8	0.7	0.2	0.04	0.01	0	3.36	1.19	0.21	0.72	367.06	0.05	0.01	5.02	130	144	36.5	25	118	75	95	24.96	4	0.98	4	16	52	107	43.9	23.3	20.6	8.22	18.97	102.1	633
1	102	1	86	1	7	69	44.5	27.3	7.8	7.8	20.2361	1.5	1404	0.75	4.9	0.71	0.1	0.11	0	0.01	3.49	0.85	0.53	2.07	537.87	0	0.03	4.42	131	129	36.4	16	120	88	52	24.8	1.85	1.54	26	48	16	68	11.7	3.2	8.5	8.17	4.34	55.6	227
1	103	1	86	2	4	69	48.2	30.2	8	7.5	14.5241	0.8	2993	0.48	4.9	0.75	0.1	0.09	0.02	0.01	3.66	0.71	0.42	2.06	231.97	0.08	0.03	2.14	45	197	36.7	27	131	60	77	27.14	2.29	1.28	7	16	21	164	13	2.7	10.3	5.56	7.63	113	508
1	104	2	84	1	7	67	48	31	12	13	13.0733	0.8	7144	1.39	7.96	0.92	0	0.02	0	0	7.32	0.43	0.19	3.12	2400.28	0	0.02	4.6	141	120	36.5	29	121	65	99	24.18	1.05	1.14	41	43	21	62	23.9	7.7	16.2	15.99	10.82	91.7	424
1	105	2	84	1	4	55	48	3	10.8	10.8	14.9608	1.4	1250	0.88	5.7	0.61	0.25	0.13	0	0	3.49	1.43	0.76	1.74	361.2	0.01	0.02	4.41	148	112	36.1	20	177	97	95	23.42	1.63	1.14	16	26	68	62	20	5.8	14.2	5.17	5.77	93.2	328
1	106	1	85	1	8	57	43	25	8.5	7.6	14.456	2.64	3046	0.56	6.84	0.84	0	0.07	0	0	5.71	0.65	0.47	4.02	1537.31	0.01	0	5.25	175	120	36.4	24	122	62	74	26.65	1.5	1.22	12	18	15	71	26.7	8.1	18.6	7.71	6.63	53	454
2	107	2	72	1	5	68	47	29	9	8.5	11.4235	0.93	682	0.39	6.8	0.64	0.2	0.07	0.01	0	4.37	1.93	0.45	1.15	382.66	0.07	0.02	5.71	169	157	36.2	18	112	79	63	22	1.17	1.29	30	35	21	93	10.4	3.3	7.1	6.44	7.69	77.9	353
1	108	1	77	1	6	62	43	30	9	9	7.2	1.6	1369	0.51	7.4	0.61	0.31	0.06	0.02	0	4.48	2.3	0.44	0.75	276.59	0.11	0.02	4.73	142	226	36.2	16	125	83	71	27.86	2.07	1.05	15	31	174	179	12.7	0.5	12.2	5.64	12.85	94.3	473
1	109	2	68	2	7	61	45.7	32.8	9	8.5	7.2	0.85	863	0.1	8.6	0.75	0.17	0.08	0	0	6.44	1.47	0.68	2.87	832.38	0	0.01	6.32	190	155	36.3	20	94	69	71	34.85	1	1.46	23	23	38	50	40.1	10.1	30	6.3	5.83	91.6	518
2	110	2	65	1	1	57	57.4	39.5	10	10.4	16.9407	1.1	649	0.2	6.99	0.68	0.2	0.07	0	0	4.73	1.75	0.48	1.43	405.43	0.02	0.01	4.92	150	205	36.6	16	115	76	75	21.1	1.53	1.38	17	26	26	79	15.5	3.7	11.8	4.87	11.1	93.9	366.1
1	111	1	84	1	6	65	44	29	12	12	12.5405	0.88	35000	2.15	3.44	0.66	0.1	0.14	0.03	0	2.27	0.59	0.48	1.74	515.56	0.09	0.01	4.8	134	105	36.5	20	101	67	81	20.74	1.38	1.31	32	44	66	83	18.1	3	15.1	4.57	14.78	134.5	537
1	112	1	82	1	5	54	36.8	26.7	6.3	6.3	29.2987	1	3295	1.22	6.4	0.68	0.2	0.1	0.01	0.01	4.37	1.32	0.65	2.04	460.17	0.04	0.03	4.2	139	221	36.6	22	116	57	91	20.28	2.07	1.1	14	29	127	145	11.8	2.7	9.1	5.15	5.95	77.3	348
2	113	1	82	1	5	51	50.2	37.1	7.4	8.3	16.5492	0.67	5000	1.02	7.6	0.63	0.2	0.1	0.02	0.01	4.82	1.84	0.74	2.07	403.41	0.17	0.06	4.61	154	395	36.5	16	95	63	76	21.16	3.63	1.08	8	29	26	56	30.6	6	24.6	6.14	8.32	80.6	467
2	114	1	83	2	6	58	38.6	27	10.8	11.5	14.9493	1	18964	1.47	7.5	0.85	0	0.07	0.01	0	6.36	0.57	0.53	6.04	1037.68	0.06	0.01	3.19	93	182	36.6	22	116	57	91	17.06	0.91	1.21	33	30	31	112	10.1	2.2	7.9	7.39	23.08	276.9	603
2	115	2	84	1	4	60	55	38	13.7	13.7	7.51157	1.3	2137	2.44	6.1	0.83	0	0.04	0.01	0.01	5.07	0.69	0.27	2.11	529.04	0.05	0.04	2.13	72	130	36.5	19	119	93	59	28.83	0.93	1.16	27	25	45	77	8.3	1.7	6.6	7.46	25.09	192.4	685
2	116	1	83	1	8	79	39.8	21	7.4	7.4	6.7	0.86	2134	2.71	7.37	0.89	0	0.07	0	0	6.52	0.32	0.53	10.93	1283.63	0	0	2.66	63	123	36.2	28	83	51	58	27.35	2.25	1.2	4	9	38	60	13.4	6.6	6.8	11.25	21.5	215.7	722
1	117	1	75	1	8	65	44	29	12	12	7.2	2.3	20000	0.6	8.1	0.71	0.2	0.05	0.02	0.01	5.7	1.74	0.42	1.27	442.24	0.14	0.05	4.39	135	186	36.5	17	155	74	60	26.97	2.38	1.28	8	19	15	85	17.4	2.2	15.2	9.44	6.79	121.8	458
1	118	1	33	1	7	64	38	24	11	11	10.9414	1.1	2314	0.39	10.75	0.7	0.2	0.09	0.01	0	7.54	2.18	0.95	3.18	560.31	0.05	0.03	5.39	162	260	36.5	21	142	100	87	25.07	0.88	1.67	17	15	13	71	14.7	3.5	11.2	6.12	4.13	62.2	379
1	119	2	57	3	4	60	49	32	8.5	8.5	13.464	1	781	0.75	5.75	0.72	0.1	0.13	0.01	0.01	4.16	0.77	0.73	3.83	772.57	0.04	0.05	4.89	143	138	36.3	20	119	70	99	26.38	1.04	1.27	28	29	80	80	36.8	5.5	31.3	4.02	7.03	65.9	480.6
1	120	1	70	1	4	70	42	25	9.9	8.7	7.48607	0.68	7606	0.53	6.1	0.8	0.14	0.05	0.01	0	4.88	0.85	0.29	1.55	700.42	0.03	0.02	4.33	122	214	36.4	4	140	69	84	33.69	2	1.65	13	26	21	112	9.6	2.2	7.4	6.57	6.09	76.9	222
1	121	2	60	1	4	53	56	41	9	9	13.701	0.61	1280	0.31	3.89	0.7	0.2	0.05	0.01	0	2.74	0.92	0.18	0.43	428.87	0.04	0.01	4.35	144	101	36.6	17	136	82	66	25.56	1.04	1.78	24	25	21	80	13.9	3.9	10	3.93	4.32	69.3	186
1	122	2	57	1	8	63	46	30	13	13	7.2	0.8	2100	6.72	13.6	0.85	0	0.05	0	0	11.44	1.41	0.68	5.41	1062.87	0.01	0.01	4.42	131	503	36.5	19	117	68	109	22.98	1.04	0.71	48	50	39	120	8.4	0.9	7.5	15.32	9.63	73.5	374
1	123	1	82	1	5	50	52	42	11	11	13.0581	0.7	1388	0.9	5.89	0.83	0	0.1	0	0	4.88	0.41	0.6	7.03	1106.93	0	0	3.13	93	155	36.5	18	96	60	75	19.83	1.71	1.01	14	24	16	89	7.4	5.6	1.8	7.5	17.73	190.4	499.5
1	124	2	87	1	9	53	46	34	12	12	9.97757	1.5	2496	0.6	6.2	0.7	0.1	0.11	0.02	0.01	4.36	0.97	0.7	3.04	413.53	0.14	0.03	3.44	92	206	36.4	24	102	57	84	25.12	1.75	1.15	12	21	76	86	13.4	4.5	8.9	9.9	8.33	85.7	224
1	125	2	79	2	8	58	43	29	7.7	8	13.2292	1.2	667	0.96	4.5	0.71	0.2	0.07	0.01	0	3.18	0.9	0.33	1.06	318	0.06	0.01	4.47	90	258	36.7	27	107	67	77	24.52	1.26	1.71	27	34	58	68	14.9	3.8	11.1	5.29	7.01	70.3	322
1	126	1	71	1	10	60	43	30	8.6	8.6	19.3927	0.57	1680	0.67	6.12	0.74	0.1	0.06	0.02	0	4.54	1.09	0.38	1.47	624.77	0.1	0.01	5.14	150	183	36.1	16	133	77	65	27.64	1.08	1.21	26	28	77	101	11.1	0.4	10.7	7.83	11.27	89.9	539
1	127	2	59	1	10	56	66	51	11	11	12.5006	1.6	1825	1.86	4.6	0.7	0.2	0.06	0.03	0	3.17	0.96	0.25	0.72	323.6	0.16	0.01	3.75	98	26	36.6	20	134	64	93	17.99	1.33	0.98	15	20	37	131	12.8	4.4	8.4	11.14	7.73	48.7	250.8
1	128	2	67	1	7	64	49	34	14	14	10.6171	1.5	12088	0.44	8.62	0.7	0.1	0.1	0.04	0	6.04	1.38	0.83	3.52	713.42	0.34	0.03	5.68	163	170	36.3	20	111	62	110	20.33	1.06	1.25	66	70	18	69	14	2.8	11.2	2.9	6.03	66.5	205.1
2	129	2	82	1	7	63	52.5	34.3	10	10.4	15.1023	1.1	479	0.15	5.5	0.62	0.28	0.08	0.02	0.01	3.37	1.54	0.41	1.03	262.6	0.1	0.05	6.4	120	221	36.2	20	98	63	98	29.1	1.67	1.27	12	20	7	72	22.2	3.8	18.4	12.06	12.1	93.7	424.5
1	130	2	51	1	7	62	47.9	32.1	8.1	7.7	9.02234	0.72	509	0.22	13.2	0.91	0.07	0.03	0	0	12	0.86	0.33	4.49	2065.12	0	0.02	5.04	148	166	36.3	20	163	120	94	24.52	1.75	1.51	16	28	47	75	4.4	3.9	0.5	3.6	4.43	81.7	418.7
1	131	2	54	1	7	52	66	49	10	10	7.2	2.36	35000	6.99	5.27	0.78	0	0.1	0	0.01	4.11	0.61	0.51	3.33	855.69	0.01	0.03	4.53	127	176	36.4	20	93	70	98	24.75	1.41	1.02	34	48	58	77	16.1	5.1	11	4.24	8.53	117.9	511.5
1	132	2	54	2	8	55	48	40	9	9.5	13.5387	1	3273	0.31	6.9	0.84	0	0.1	0	0	5.74	0.41	0.68	9.41	2422	0.03	0.03	5.33	173	172	36.3	23	102	81	113	18.68	1.5	1.23	10	15	38	92	12.6	1.3	11.3	5.74	5.14	55.8	217
1	133	2	60	1	7	65	40.6	26.4	6.6	6.6	13.2038	1.64	325	0.23	4.82	0.76	0	0.08	0.02	0	3.65	0.67	0.37	1.91	724.55	0.11	0.02	4.21	133	86	36.6	22	107	71	86	24.79	1.48	1.22	21	31	258	204	31.1	8.8	22.3	4.78	7.33	60.2	385.6
1	134	1	83	1	4	69	43.7	26.7	9.8	9.3	18.4325	0.7	1585	0.64	4.1	0.65	0.2	0.07	0.02	0	2.66	1.01	0.3	0.68	279.17	0.09	0.02	3.63	106	161	36.3	20	107	63	82	28.07	2.67	1.3	6	16	10	66	10.6	2.4	8.2	4.26	12.41	136.8	380
1	135	1	69	1	6	60	49	35	9.8	10	12.2375	0.87	2083	1.34	8.13	0.68	0.2	0.09	0	0	5.54	1.82	0.74	2.14	401.8	0.02	0.01	4.27	132	289	36.5	20	131	81	81	23.86	0.89	1.25	118	105	85	174	9.5	1.8	7.7	4.58	7.33	59.9	238
1	136	1	83	3	9	59	43	25	8.6	8.5	23.5405	2	3836	1.67	4.3	0.65	0.2	0.1	0.01	0.01	2.79	1.02	0.41	1.01	325.5	0.05	0.04	3.76	119	218	36.3	23	85	59	73	20.22	2.75	0.92	8	22	25	103	17.5	5.2	12.3	3.6	3.59	60.8	289
2	137	2	81	1	5	62	37.3	25	11.1	11.6	18.2511	0.72	3553	1.17	6.02	0.84	0	0.07	0.01	0.01	5.03	0.51	0.39	3.98	1479.41	0.05	0.04	4.72	150	63	36.6	23	144	89	120	23.63	1.63	0.98	19	31	26	153	14.3	5.3	9	5.99	7.52	91.6	417
2	138	1	76	1	9	60	45	31	11.4	11.6	9.0458	0.78	5864	2.62	7.2	0.79	0	0.05	0	0	5.65	1.12	0.35	1.9	438.88	0.02	0.02	2.88	87	146	36.7	24	211	104	107	25.51	1.5	0.63	14	21	15	50	4.6	1.3	3.3	6.87	67.59	1681.5	1032
1	139	1	81	1	6	63	42	24	12	12	9.65557	0.52	700	0.42	7.1	0.65	0.2	0.05	0.03	0.01	4.59	1.88	0.37	0.79	400.4	0.19	0.04	5.96	164	207	36.4	18	120	83	73	33.63	1.91	1.17	11	21	31	109	9.8	2.4	7.4	5.24	4.74	56.4	363
2	140	2	70	1	3	82	29.9	15.3	10.1	9.7	6.7	1.5	1570	0.4	7.47	0.72	0.1	0.09	0.01	0.01	5.36	1.3	0.69	2.97	482.4	0.08	0.04	5.04	117	230	36	20	130	80	70	20.91	2.5	0.93	10	25	20	111	34.6	12.4	22.2	5.73	15.93	163.1	692
1	141	2	87	1	16	68	38.4	24	8.5	9.2	15.5637	0.52	1047	0.79	3	0.75	0.1	0.08	0	0	2.27	0.51	0.24	0.96	654.29	0	0.01	4.44	147	68	36.6	22	123	75	91	23.14	1.21	1.12	24	29	22	63	16.1	2.4	13.7	9.17	5.73	103.1	265
1	142	1	77	1	5	63	47	30.2	9.6	8.9	16.6278	0.4	170	0.39	4.9	0.56	0.2	0.12	0.06	0	2.73	1.26	0.6	1.19	292.5	0.3	0.01	4.19	135	98	36.2	19	104	59	72	22.13	1.83	1.38	12	22	18	54	9.1	2.3	6.8	5.28	5.09	41.6	154
2	143	1	85	2	6	55	48	32	15	14	31.8258	2	2311	1.71	4.2	0.74	0.1	0.07	0.01	0.01	3.11	0.71	0.31	1.49	473.07	0.04	0.02	4.36	108	205	36	20	157	69	70	20.63	2.38	0.76	8	19	12	89	9.6	2	7.6	5.59	6.2	80.3	370
1	144	2	90	1	4	65	43	25	9	9	11.0687	0.66	2642	0.65	5.6	0.78	0	0.08	0.01	0	4.4	0.74	0.46	2.63	802.7	0.03	0.01	4.41	135	125	36.2	18	114	50	47	22.27	1.86	0.89	37	69	61	114	9	3.7	5.3	7.37	8.61	119.1	390
2	145	1	75	2	10	64	45	29	10.7	10.7	23.3153	0.71	1710	1.88	3.6	0.84	0	0.07	0	0	3.05	0.32	0.25	2.51	1448.75	0.01	0	4.74	152	61	36.5	23	147	78	83	19.33	2.88	1.22	8	23	16	109	30.6	8.2	22.4	9.82	9.48	61.2	340
1	146	1	75	1	6	60	47	31	12	12	19.4906	1.4	1125	2.34	6.75	0.74	0.1	0.13	0	0	4.99	0.89	0.86	4.71	829.8	0	0.01	4.97	148	117	36.5	25	136	71	85	29.82	1.71	1.13	7	12	11	68	9	2.5	6.5	6	14.34	145.1	428
2	147	1	83	1	7	55	55	41	13.3	12.4	18.9515	2.95	1179	0.32	4.57	0.64	0.2	0.09	0.01	0	2.9	1.22	0.39	1.06	287.62	0.04	0.02	4.26	121	113	36.2	22	146	85	70	30.66	1.12	1.45	49	55	45	78	18.7	5.6	13.1	4.96	13.15	79.8	462
1	148	2	74	1	6	65	46.5	30.1	9	9.8	13.7376	0.76	1002	0.3	5.74	0.87	0	0.07	0	0	4.97	0.35	0.41	5.71	2825.8	0	0.01	6.49	199	90	36.6	20	152	98	82	25.1	1.67	1.26	21	35	11	54	18	2.4	15.6	6.49	8.33	73.8	374.7
1	149	2	74	1	6	65	46.5	30.1	9	9.8	13.6586	0.76	1002	0.52	5.74	0.87	0	0.07	0	0	4.97	0.35	0.41	5.71	2825.8	0	0.01	6.49	199	90	36.6	20	152	98	82	25.1	1.67	1.26	21	35	11	54	18	2.4	15.6	6.49	8.33	73.8	374.7
1	150	1	78	1	7	68	43	28	10	10	21.7543	1.4	2064	0.23	3.7	0.83	0	0.07	0.01	0.01	3.04	0.33	0.27	2.38	1022.55	0.02	0.02	3.71	111	83	36.8	20	121	91	127	22.02	1.11	1.67	35	39	58	95	34.3	10.5	23.8	5.08	3.23	58.5	204
1	151	2	35	1	9	60	53	35.8	13.6	14.7	20.463	1.1	1516	0.21	7.19	0.67	0.2	0.08	0.01	0.01	4.83	1.65	0.57	1.56	477.15	0.1	0.04	5.57	163	209	36.3	20	172	114	93	26.67	1.36	1.34	25	34	44	88	12.5	4.9	7.6	4.31	11.63	215.3	477
1	152	1	40	1	5	56	52	38	9	9	12.6912	0.94	87	0.38	6.7	0.61	0.3	0.07	0.02	0.01	4.11	2	0.46	0.84	230.16	0.12	0.04	4.04	112	210	36.6	20	126	74	89	29.71	0.75	1.26	67	50	47	70	8.6	0.7	7.9	4.55	5.13	56.7	307
1	153	2	66	1	4	53	53.6	38.9	9	11	10.3175	0.83	55	0.28	3.9	0.66	0.2	0.08	0.02	0	2.57	0.88	0.33	0.85	405.94	0.08	0.02	4.56	139	190	36.2	20	104	67	64	32.71	1.69	1.39	13	22	23	53	11.8	2.8	9	6.49	5.65	64.2	228
1	154	2	69	1	4	63	37	24	9	9	20.5751	0.95	102	0.97	8.58	0.74	0.1	0.1	0.02	0.01	6.36	1.17	0.84	4.46	1157.85	0.15	0.06	7.06	213	226	36	20	103	73	100	14.83	1.48	1.48	25	37	26	65	22.4	3.4	19	5.16	9.63	59.8	451.5
1	155	2	67	1	7	62	34	22	9	9	16.7535	1	750	0.56	6.05	0.64	0.2	0.11	0	0.01	3.89	1.43	0.68	1.74	473.33	0.02	0.03	5.32	174	133	36.2	16	184	99	92	30.78	1.94	1.21	16	31	24	72	21	4.2	16.8	18.28	6.53	82.8	317
1	156	2	37	1	8	51	57	44	15	15	10.911	1.4	785	0.33	7.7	0.82	0	0.07	0	0.01	6.28	0.83	0.53	3.9	1709.98	0	0.05	8.58	226	174	36.1	19	152	101	98	38.88	2.73	1.06	11	30	66	84	18.6	12.3	6.3	4.71	7.23	41.4	86
2	157	1	81	1	10	64	39	24	10	10	21.344	2	4114	1.28	11.91	0.81	0	0.11	0	0	9.67	0.93	1.29	13.54	1372.52	0	0.02	4.72	132	140	36.5	19	93	64	76	13.13	1.58	0.99	19	30	29	90	19.2	6.2	13	6.69	10.21	49.8	658
2	158	1	68	1	8	50	50	37	8	8	19.3511	1.2	9737	4.86	6.27	0.81	0	0.07	0.03	0	5.09	0.58	0.42	3.82	509	0.17	0.01	1.99	58	280	36.3	22	128	67	78	31.05	1.05	0.75	39	41	169	313	6.7	0.8	5.9	10.85	32.15	164.1	864
1	159	1	78	1	6	56	42	28	12	12	14.2418	0.6	16010	1.39	5.84	0.61	0.2	0.08	0.05	0.01	3.58	1.49	0.45	0.97	177.8	0.27	0.05	2.39	74	143	36.5	25	124	76	105	20.02	2.5	1	8	20	16	36	5.5	0.3	5.2	6.25	17.73	456.2	369
1	160	2	68	1	6	63	52	34	8.5	9	15.7347	0.83	228	0.43	9.31	0.81	0	0.11	0.01	0	7.57	0.66	1	11.36	1800.74	0.06	0.02	5.05	157	84	36.5	20	132	68	80	30.77	0.83	1.09	29	24	39	97	14.9	3.5	11.4	5.86	3.27	83.1	286
2	161	1	58	1	6	64	57	39	12	12	10.4947	1.2	94	1.31	4.2	0.54	0.4	0.04	0.01	0	2.23	1.7	0.15	0.33	125.93	0.06	0.02	3.95	96	281	36.6	20	113	62	96	27.44	1.58	1.22	12	19	15	65	8.4	2.4	6	6.07	7.23	59	301
2	162	2	94	1	7	62	45	30	13	14	23.1759	0.6	974	1.33	7.1	0.86	0	0.06	0	0	6.11	0.57	0.41	4.52	1854.44	0.01	0.01	5.84	173	156	36.4	24	110	52	74	27.23	1	1.321	27	27	158	153	17.1	5.4	11.7	10.3	6.26	64.9	354
1	163	1	73	1	7	55	35	20	14	14	13.4897	1	3305	0.22	3.7	0.62	0.3	0.07	0.01	0	2.29	1.1	0.26	0.43	247.74	0.02	0.02	3.66	119	129	36.3	23	144	94	93	26.16	1.07	1.51	108	116	44	79	9.3	2.1	7.2	5.03	6.68	99.6	288
1	164	2	58	2	4	77	49.3	26.7	7.6	8	17.7273	0.63	389	0.37	3.43	0.73	0.1	0.09	0.02	0	2.49	0.59	0.29	1.11	692.14	0.05	0.01	5.22	164	76	36.3	21	136	82	90	28.66	0.59	1.4	37	22	86	65	14.6	2.1	12.5	5.2	4.44	90.9	266
1	165	1	68	1	11	63	47	31	11	10.1	14.4888	0.77	711	0.62	8.78	0.84	0	0.04	0	0	7.35	1.04	0.36	2.43	876.35	0.01	0.02	3.78	124	170	36.7	20	148	73	73	25.69	0.65	1.19	17	11	22	80	6.6	1.8	4.8	18.98	25.3	304.7	618
2	166	1	52	1	4	72	35.4	21	8.2	7.8	9.27452	0.87	7650	0.21	5.5	0.8	0	0.04	0	0	4.37	0.85	0.23	1.31	750.61	0.01	0.01	4.44	146	150	36.3	20	93	59	75	14.52	1.73	1.68	15	26	18	121	25.5	1.8	23.7	7.16	9.8	74.2	335.5
1	167	2	44	1	9	67	44	29	10	10	15.1047	0.88	23719	0.58	8.86	0.7	0.2	0.07	0.01	0	6.22	1.91	0.63	1.94	309.37	0.08	0.02	3.36	95	427	36.4	20	122	78	74	22.34	0.56	1.01	36	20	10	107	4.7	0.6	4.1	5.79	15.59	288.9	348
1	168	1	76	1	10	78	39.4	21.1	7	7	13.0574	0.8	12521	7.61	4.67	0.66	0.1	0.16	0.03	0	3.09	0.64	0.76	3.56	400.73	0.16	0.02	3.34	83	146	36.3	20	101	57	59	17.45	0.71	0.98	167	118	176	154	19.5	11.2	8.3	6.34	39.13	211.7	1014.3
1	169	2	68	1	5	55	47	32	13	13	11.356	1	808	0.21	6.66	0.64	0.2	0.05	0.01	0	4.27	1.95	0.36	0.68	413.86	0.06	0.02	6.31	189	126	36.2	25	135	92	98	27.71	0.96	1.33	45	43	29	63	30.8	5	25.8	11.32	6.83	94.1	351
1	170	2	61	1	7	50	61.9	46.3	7.7	7.1	19.3039	1.2	399	0.1	6.72	0.6	0.2	0.12	0.01	0	4.06	1.78	0.78	1.67	342.13	0.08	0.02	4.61	150	189	36	20	120	92	75	24.99	0.41	1.73	124	51	102	102	21.9	6.9	15	4.57	4.96	89.2	422
1	171	1	75	1	5	58	41	26	10	10	22.3051	1.2	8560	2.13	7.1	0.7	0.1	0.1	0.01	0	5.01	1.36	0.71	2.51	515.74	0.06	0.03	5.03	140	243	36.2	22	97	59	88	20.96	3.57	1.13	7	25	35	163	43.1	11.5	31.6	5.25	9.37	65.4	504
2	172	1	82	1	7	55	43	32	9	9	13.6678	1.4	5505	5.89	7.2	0.88	0.07	0.05	0	0	6.37	0.47	0.39	5.42	1789.02	0.01	0	4.29	132	135	36.2	18	132	98	78	20.89	3	1.28	6	18	56	73	38.9	6.7	32.2	9.78	10.58	103.7	455
1	173	1	31	1	7	50	61	49	9	9	10.372	0.77	2360	6.47	6.6	0.55	0.3	0.06	0	0	3.6	2.57	0.37	0.41	183.5	0.01	0.02	4.24	131	324	36.3	20	153	85	112	35.46	1.56	1.19	27	42	100	114	23.1	4.4	18.7	6.12	5.64	55.4	488
2	174	1	53	1	7	80	38.6	20.2	8.4	8.4	18.1348	0.71	1665	0.23	5.2	0.65	0.2	0.08	0.01	0.02	3.4	1.3	0.43	1.25	253.69	0.05	0.08	4.89	97	221	36.2	20	127	82	71	27.53	1.39	1.29	18	25	33	71	21.5	0.9	20.6	4.8	6.7	75.9	394.1
1	175	1	70	2	4	72	57.7	33.8	9.9	8.7	17.7307	0.8	182	0.1	2.5	0.74	0.1	0.06	0	0.01	1.84	0.45	0.16	0.54	130.84	0.01	0.03	1.85	32	165	36.7	18	121	55	90	26.19	2.17	1.9	6	13	11	85	28.3	7	21.3	4.8	2.81	55.1	332
1	176	2	60	1	6	50	58	42	12.8	14	12.3912	0.75	2666	0.21	4.4	0.75	0.1	0.07	0.01	0.01	3.21	0.72	0.28	1.14	610.79	0.06	0.03	4.63	137	128	36.6	23	185	105	87	26.01	1.26	2.19	23	29	32	92	15.8	2.9	12.9	5.28	10.7	117.5	423
2	177	1	73	2	9	62	38	23	11	10	17.8455	1.5	604	1.42	8.3	0.78	0	0.05	0.01	0	6.53	1.31	0.44	2.32	727.77	0.05	0.01	5.21	146	159	36.3	17	108	67	62	20.12	1.65	1.02	20	33	140	162	25	3.1	21.9	9.86	13	57.9	403.4
2	178	1	81	1	7	71	52.8	31.3	7.8	7.8	19.5413	1.4	1885	1.35	5.4	0.69	0.1	0.07	0.04	0.01	3.74	1.05	0.37	1.45	434.55	0.23	0.03	4.15	122	179	36.6	20	172	89	69	26.25	2.11	1.38	9	19	28	118	9.1	1.5	7.6	7.49	12.65	153.2	449
2	179	1	80	1	7	58	46.1	32	8.2	8.2	21.1213	0.75	455	1.45	4.13	0.62	0.2	0.08	0.02	0.01	2.54	1.13	0.34	0.89	314.69	0.09	0.03	4.41	140	138	36.7	20	105	59	88	25.08	1.36	1.5	28	38	52	80	13.4	2.8	10.6	5.15	11.39	73.3	464
1	180	1	65	1	7	58	44	34	10.1	9	20.6113	1.4	10200	0.59	10.5	0.92	0	0.03	0	0	9.6	0.52	0.32	5.8	1975.38	0.01	0.02	3.37	107	200	36.3	18	138	86	79	26.25	2.86	0.87	7	20	19	86	16.1	2.7	13.4	13.89	7.92	87.3	376
2	181	2	50	3	4	65	49.8	32.1	6.6	8.1	11.8468	1.5	188	0.21	7.24	0.65	0.2	0.05	0.01	0	4.72	2.13	0.33	0.86	345.69	0.04	0.02	4.9	156	200	36.2	20	94	61	65	25.15	1.57	1.56	14	22	17	55	11.9	0.7	11.2	5.86	8.6	68.3	269
2	182	2	69	2	4	66	50	34	12	12	9.21916	1	2513	1.57	15.72	0.73	0.1	0.09	0.03	0.01	11.54	2.34	1.33	6.69	759.47	0.42	0.09	4.73	154	222	36.4	24	107	71	94	25.17	1.38	0.89	21	29	27	62	27.5	6.8	20.7	6.97	9.4	101.3	331
2	183	1	67	1	12	55	52	39	9	9	9.87747	1.1	408	0.1	6.4	0.63	0.3	0.06	0.01	0	4.06	1.92	0.41	1	348.91	0.03	0.01	5.2	165	111	36.2	22	136	75	126	25.19	0.32	1.39	163	52	213	90	25.5	4.3	21.2	6.22	11.1	81.6	435.4
1	184	2	60	1	6	75	44.9	25.1	11.5	21.4	24.9998	0.7	2207	0.39	5.7	0.58	0.31	0.09	0.01	0.01	3.35	1.78	0.51	0.85	348.17	0.04	0.04	7.2	185	245	36.2	20	116	80	72	31.04	2.67	1.61	9	24	13	66	19.6	3.7	15.9	4.12	5.43	77.9	509
2	185	2	55	1	13	69	51.4	31.2	11.8	11.8	19.4597	0.81	5331	2.45	3.53	0.71	0.1	0.07	0.02	0	2.51	0.68	0.26	1.09	180.87	0.08	0	1.06	49	70	36.3	19	164	76	86	25.83	1.62	1.93	13	21	20	64	29.7	8.1	21.6	5.78	15.02	182.8	617
2	186	2	70	1	5	63	42	27	14	15	13.7549	0.6	5813	2.14	5.9	0.95	0	0.02	0	0	5.34	0.21	0.09	2.42	4094	0	0	4.49	161	122	36.4	16	126	72	79	23.39	0.86	1.44	745	640	214	122	20.3	6	14.3	13.93	9.65	84.8	430
2	187	2	59	1	9	69	44.9	27.7	7.5	7.5	18.571	0.8	140	0.1	6.9	0.74	0.2	0.04	0.01	0	5.04	1.44	0.29	1.15	532	0.06	0.02	4.76	152	208	36	19	115	81	102	19.18	0.67	1.47	84	56	140	116	20	4	16	5.08	7.98	101.5	195
1	188	2	36	1	8	65	52.5	35.5	11.5	11.5	9.40243	1.24	4986	1.27	6.59	0.68	0.2	0.06	0.04	0	4.49	1.38	0.41	1.22	344.88	0.29	0.02	3.33	106	198	36.2	20	157	94	80	27.85	1.33	1.73	15	20	39	111	12.7	1.7	11	5.42	15.23	377	586
2	189	1	70	1	8	59	52	39	11.7	12	22.8064	1.26	5275	2.26	4.48	0.55	0.3	0.11	0	0	2.47	1.51	0.5	0.95	181.57	0	0	3.68	111	125	36.3	21	159	84	88	19.8	2.29	0.77	21	48	396	266	23.8	11.4	12.4	4.13	6.3	54.7	362
2	190	1	59	1	5	67	42.2	26.6	9.4	9.4	12.6055	0.8	1262	0.32	4.31	0.48	0.4	0.07	0.02	0	2.06	1.85	0.32	0.49	134.74	0.07	0.01	4.26	121	105	36	17	157	85	67	22.57	1.23	1.38	26	32	13	103	19.4	1	18.4	5.24	7.8	64.5	301.2
1	191	2	71	1	5	67	42.7	26.9	8.3	7.2	14.4744	0.7	146	0.21	6.4	0.75	0.18	0.06	0	0	4.8	1.17	0.39	1.49	627.69	0.01	0	4.71	153	211	36.2	22	137	68	110	27.03	0.39	1.78	66	26	32	54	26.4	5.3	21.1	4.28	11.33	79.5	372
1	192	2	65	4	5	65	45	29	12	13	15.3005	2	2045	0.2	8.09	0.57	0.3	0.07	0.01	0.01	4.6	2.83	0.58	0.83	318.59	0.04	0.04	6.33	196	163	36.5	18	141	91	78	25.3	2.6	1.18	30	78	48	166	20.6	4.3	16.3	5.15	4.73	81.2	242
1	193	1	88	1	8	72	46.2	27.1	8	8	23.0318	1.2	3480	2.89	3.7	0.62	0.21	0.17	0.01	0	2.29	0.76	0.61	1.73	229	0.02	0.01	2.42	76	124	36.6	20	116	78	78	20.13	1.3	1.1	9	12	35	90	48.1	22	26.1	5.67	10.73	115	532.9
1	194	1	55	1	7	54	58	41	10.5	10.8	11.3624	1.3	1745	3.99	8.92	0.82	0	0.06	0	0.02	7.29	0.9	0.57	4.51	947.7	0.03	0.13	4.8	117	341	36.7	24	150	83	107	42.82	1.36	1.14	14	19	16	85	56.3	20.2	36.1	4.85	4.53	65.9	427.7
1	195	2	56	1	2	78	50.8	20.7	8.8	7.2	7.2	1.5	420	0.27	7.75	0.64	0.25	0.07	0.03	0.01	4.94	1.96	0.56	1.3	488.96	0.24	0.05	6.34	194	141	36	20	167	71	70	22.79	1.04	1.21	27	28	32	68	14	3.3	10.7	6.78	8.08	74.1	477
1	196	1	76	4	4	69	30.2	19	7.1	6.8	19.252	0.77	494	0.59	5.86	0.65	0.2	0.11	0.02	0.01	3.8	1.22	0.66	1.95	436.07	0.14	0.04	4.81	140	239	36.3	17	103	62	71	19.86	2.27	1.22	11	25	17	102	7	1.7	5.3	4.99	3.94	44.8	207
1	197	1	73	1	5	71	46.2	27.2	8.7	7.8	20.2034	1.4	627	0.68	7.7	0.7	0.2	0.08	0.01	0	5.4	1.63	0.58	1.81	553.25	0.09	0.02	5.2	167	192	36.2	18	86	50	74	27.25	1.04	1.5	24	25	19	71	11.9	5.7	6.2	7.87	9.43	88.8	299
1	198	2	68	1	8	67	44	25	9	9	10.1251	0.57	11005	1.12	7.49	0.75	0.1	0.12	0	0	5.64	0.88	0.93	5.85	807.55	0.02	0.02	4.57	126	171	36.2	25	108	86	78	18.64	1.48	0.69	21	31	38	74	14.8	6.3	8.5	4.74	7.51	80.1	165
2	199	1	68	2	6	56	43	30	12	12.5	6.7	0.58	3361	1.32	5.3	0.74	0.2	0.05	0	0	3.96	1.05	0.29	1.22	418.63	0.02	0.02	3.83	111	135	36.6	23	153	106	106	18.47	2.21	0.72	24	53	35	174	6.8	1.1	5.7	3.39	15.3	178.2	326
2	200	1	85	1	7	64	47	30	12	12	12.7531	1.5	1633	1.6	5.5	0.64	0.3	0.04	0	0	3.48	1.72	0.23	0.6	228.63	0.02	0.02	3.36	113	190	36	20	140	95	50	25.58	5	1.12	3	15	14	85	9.8	2.5	7.3	11.37	14.1	142.3	340
1	201	2	60	1	6	63	40.3	26.7	6.9	5.6	23.9044	1.1	190	0.1	3.9	0.6	0.2	0.11	0.01	0	2.35	1.11	0.41	0.76	315.45	0.02	0.01	4.64	149	136	36.2	20	99	57	138	18.64	1.05	1.14	22	23	47	53	7.6	5	2.6	5.32	7.93	77.3	246.5
1	202	2	52	1	7	68	50	30.9	5.5	5.5	16.8463	1	619	4.4	2.6	0.68	0.1	0.13	0.02	0	1.78	0.46	0.35	1.24	479.83	0.04	0.01	4.53	124	207	36.3	22	80	64	75	18.26	2	1.07	13	26	125	297	29.8	19.5	10.3	6.87	5.73	64.8	233.4
1	203	2	78	1	5	50	56	42	9	9	15.1874	1	2605	1.16	5.44	0.59	0.2	0.08	0.04	0.01	3.23	1.53	0.45	0.84	323	0.2	0.03	4.62	153	149	36.3	19	132	90	60	25.39	2.71	1.23	7	19	13	90	30.6	5.7	24.9	4.42	4.22	72.5	345
1	204	1	27	2	5	54	59.1	42.4	8	8	18.5404	0.86	944	0.32	7.6	0.53	0.3	0.04	0.04	0	4	2.96	0.3	0.3	167.57	0.3	0.03	4.35	124	190	36.4	17	144	88	68	35.46	0.94	1.43	18	17	15	52	10.3	1.5	8.8	3.93	3.73	48.4	411
1	205	2	55	1	4	67	43.9	27.7	12	11	7.94835	0.76	1300	0.45	7.3	0.72	0.2	0.06	0.01	0.01	5.26	1.52	0.42	1.34	574.45	0.06	0.04	5.6	166	155	36.2	22	112	83	111	39.29	1.03	0.99	29	30	56	62	41.7	10.3	31.4	5.12	2.71	71.7	439
1	206	1	76	1	14	62	46.6	30.9	12.8	12.4	15.7469	0.61	912	0.26	7	0.81	0	0.06	0.02	0.01	5.68	0.76	0.41	2.95	620.32	0.12	0.05	4.49	83	272	36.3	20	141	69	95	39.36	2.33	1.79	6	14	30	79	30.5	5.3	25.2	7.23	9.5	99.1	697
1	207	1	87	1	6	60	43	28	8	9	15.1325	0.78	552	0.72	6.78	0.63	0.2	0.09	0.01	0	4.24	1.89	0.58	1.19	323.05	0.05	0.02	4.39	144	162	36.4	19	161	90	90	23.19	1.56	1.15	32	50	16	109	15.8	3.2	12.6	5.96	5.6	70.6	385
1	208	2	70	1	8	59	53	37	11	11	12.9258	1.1	646	1.32	2.76	0.72	0.1	0.1	0.02	0	2	0.43	0.27	1.15	572.09	0.05	0.01	4.13	123	165	36.5	17	138	70	59	22.79	3.46	0.77	13	45	65	146	12.5	2.8	9.7	4.73	4.43	53	347
1	209	2	67	1	4	58	52	36.1	9.4	7.8	12.4218	1.1	1040	0.63	4.11	0.57	0.3	0.06	0.01	0.01	2.36	1.45	0.24	0.28	242.51	0.04	0.02	4.94	149	122	36.2	17	90	65	40	19.66	0.99	1.4	76	75	57	91	20.3	4.5	15.8	6.42	8.11	87.2	368
1	210	2	79	1	5	52	54	40	9	9	7.2	1.7	1548	0.92	6.51	0.82	0	0.06	0.01	0	5.35	0.71	0.39	2.83	1047.39	0.04	0.02	4.52	139	201	36	17	132	88	72	26.65	2.27	1.52	11	25	16	65	20.2	3.9	16.3	5.78	4.29	91.5	337
1	1	1	80	1	6	56	42	28	9	9	10.9556	1.44	1419	0.35	4.2	0.68	0.2	0.05	0.01	0.01	2.86	1.05	0.22	0.49	370.44	0.03	0.03	4.1	136	98	36.1	20	154	80	100	27.42	2.09	1.32	11	23	24	78	30.1	5.5	24.6	11.38	6.88	57.8	335
1	212	1	76	1	4	60	55	44	8.5	8.5	12.1812	1.1	200	0.78	7.43	0.67	0.1	0.1	0.03	0.01	4.98	1.41	0.76	2.57	434.43	0.24	0.04	4.28	123	133	36.3	18	113	65	85	21.11	1.35	1.14	60	81	84	125	14.9	3.9	11	6.07	8.03	67.5	391.5
1	213	1	53	1	6	51	54.6	40.2	10.9	7.8	7.2	1	1150	0.3	6.7	0.68	0.2	0.05	0.01	0	4.59	1.71	0.32	0.75	394.58	0.09	0.03	4.71	147	196	36.1	17	120	73	77	18.14	1.9	1.07	10	19	13	60	20.4	4.1	16.3	5.02	8.51	67.1	300
1	214	2	60	1	8	64	48	32	12	13	18.7508	1.2	2177	1.08	4.67	0.66	0.17	0.11	0.06	0.01	3.06	0.8	0.5	1.8	543.15	0.27	0.04	4.93	142	263	36.3	20	148	87	64	24.07	0.8	1.05	15	12	50	89	5.7	1.7	4	6.79	19.34	314	491
2	215	2	53	1	11	51	68	51	9	9	19.6925	1.2	424	0.21	3.45	0.8	0	0.04	0.01	0	2.76	0.5	0.14	0.9	651.36	0.04	0.01	3.98	118	113	36.1	18	86	62	75	18.9	1.11	1.33	28	31	58	78	12.3	3	9.3	5.33	7.77	69.6	277
1	216	2	46	1	8	50	51.6	39.1	8.1	7.7	13.5388	0.8	2260	0.5	6.3	0.77	0	0.08	0	0	4.93	0.9	0.52	2.74	821.67	0.01	0.01	4.52	150	122	36.7	13	125	80	92	27.64	0.68	1.26	244	166	60	94	109.9	25.8	84.1	7.85	10.92	140.2	823
1	217	2	83	1	8	70	39.2	24	9.1	9.1	18.6087	0.87	861	0.92	10	0.92	0	0.02	0	0	9.66	0.62	0.2	3.01	2056.65	0.01	0	4.07	132	273	36.2	18	111	54	66	27.35	0.83	1.07	35	29	12	69	7.3	1.5	5.8	6.55	10.16	57.7	153
2	218	2	78	1	7	67	46.7	29.5	11.2	12.8	16.4874	0.88	5490	1.64	12.7	0.81	0	0.07	0.02	0.01	10.35	1.06	0.94	9.31	732.31	0.27	0.11	3.4	75	836	36.2	18	101	62	96	16.45	2.88	0.83	8	23	25	55	19	4.9	14.1	5.56	8.64	78.9	334
2	219	1	86	1	4	55	38	28	9	9	11.6226	1.1	1400	3.7	3.9	0.76	0	0.06	0.01	0	2.98	0.64	0.24	1.25	433.03	0.04	0.02	2.92	93	100	36.4	18	87	55	92	20.61	2.38	0.5	13	31	10	95	17.4	8.7	8.7	9.61	14	182.2	730
1	220	1	84	1	5	62	44	33	13	14	18.7264	1.1	1500	0.5	2.01	0.64	0.2	0.06	0	0	1.25	0.57	0.12	0.15	302.63	0	0	4.3	138	103	36.6	16	135	72	47	22.34	1.67	1.31	18	30	65	81	11	1.2	9.8	8.12	5.04	44.9	234
1	221	2	55	1	6	53	57.6	41.7	7.8	7.5	7.2	0.8	266	0.29	6.61	0.69	0.2	0.07	0.02	0	4.57	1.44	0.48	1.41	476.04	0.11	0.01	4.71	150	265	36.1	20	137	77	99	23.16	1.67	1.35	18	30	13	69	13.6	1.8	11.8	9.36	7.34	113.2	472
2	222	2	60	1	6	61	45	30	9	10	7.83076	1.54	2910	1.1	8.1	0.69	0.1	0.11	0	0	5.6	1.53	0.92	3.5	658.82	0.02	0.03	7.51	180	145	36.6	26	109	70	86	25.92	1.03	1.19	34	35	94	90	18.7	1.8	16.9	5.25	9.5	73.7	278.9
2	223	1	80	1	5	63	46	31	12	13	20.2743	0.88	7293	0.41	5.2	0.76	0	0.07	0	0	3.95	0.89	0.34	1.64	710.11	0	0.02	7.46	160	180	36.3	22	155	75	95	32.26	3	1	8	24	15	132	17.3	5.5	11.8	5.63	8.31	66.1	425
2	224	2	68	2	6	62	43	28	9	11	11.5227	1	1532	1.41	6.8	0.65	0.28	0.07	0	0.01	4.44	1.87	0.46	1.22	353.78	0.01	0.03	4.2	149	134	36.3	81	113	81	81	19.74	1.19	1.43	36	43	96	104	34.6	0.1	34.5	6.19	14.5	83.5	368.7
1	225	1	77	5	9	55	47	32	12	12	13.9608	1.4	3833	7.05	5.9	0.78	0	0.06	0.02	0.01	4.53	0.8	0.38	2.04	509.63	0.11	0.04	3.53	90	330	36.5	19	99	53	49	29.68	3.4	0.86	5	17	22	85	14.9	4.5	10.4	5.14	16.58	156.5	687
1	226	2	56	1	8	59	72.9	60.4	6.7	6.7	9.84965	0.65	3273	0.4	6.1	0.5	0.27	0.05	0.17	0.01	3.02	1.66	0.29	0.42	292.9	1.03	0.08	5.09	161	183	36.2	20	149	96	71	29.69	1.07	1.68	14	15	20	60	10.7	1.6	9.1	4.48	9.72	77.9	364
1	227	1	52	1	8	53	53	39	9	9	22.4417	0.7	2346	0.84	6.92	0.71	0.1	0.1	0.01	0.01	4.92	1.14	0.72	3	746.63	0.1	0.04	5.51	173	151	36.6	26	83	49	76	18.73	1.6	0.95	25	40	441	262	34.4	11.2	23.2	13.88	10.53	58.3	535
2	228	2	30	1	6	50	46	33	9	9	16.5074	1.2	27764	3.77	8.3	0.86	0	0.05	0.01	0.01	7.13	0.68	0.43	4.64	1310.66	0.05	0.05	4.15	125	184	36.6	17	213	160	103	35.46	0.83	1.56	35	29	30	72	19.5	4.4	15.1	6.07	25.76	329.8	806
1	229	2	76	1	8	66	41	28	9	10	7.2	1.25	10460	1.4	11.5	0.85	0	0.04	0.04	0	9.73	0.77	0.47	5.83	1668	0.47	0.01	3.94	132	195	36.3	23	112	63	93	17.97	1.61	0.96	18	29	55	67	13.7	2.8	10.9	5.72	14.18	128.4	375
1	230	1	45	1	8	63	43.4	28.8	8.7	8.3	13.0581	0.79	610	0.24	9.8	0.7	0.2	0.04	0.02	0	6.86	2.34	0.39	1.03	366.45	0.15	0.03	4.27	125	272	36.2	20	121	75	74	26.5	1.18	1.34	17	20	34	80	4.4	1.1	3.3	4.92	4.31	51.2	327
2	231	1	58	1	6	63	42	27	10	9	30.1732	0.83	5029	1.02	5.2	0.78	0	0.08	0.01	0.01	4.06	0.68	0.41	2.58	1158.29	0.04	0.04	7.01	194	132	36.5	25	99	66	95	26.86	1.12	1.23	43	48	65	101	36.4	8	28.4	8.26	6.82	85.1	653
1	232	2	65	1	6	53	52.1	38	6.5	7.2	11.9868	0.76	5551	0.45	7.8	0.79	0	0.04	0.01	0	6.16	1.24	0.29	1.33	506.71	0.06	0.03	3.2	102	235	36.6	20	123	56	68	24.13	0.48	1.27	42	20	40	99	6.9	0.8	6.1	15.14	14.93	230.5	297
1	233	1	74	1	6	60	34	26	14	14	25.4371	1.3	3539	0.76	6.2	0.78	0	0.06	0.04	0.01	4.85	0.66	0.38	2.68	925.91	0.28	0.05	3.85	126	160	36.5	29	99	52	99	16.71	2.18	1.43	11	24	10	50	21.4	3	18.4	5.49	11.81	136.5	591
1	234	2	69	1	6	51	60.2	45.8	9.1	9.9	12.2286	0.8	1836	1.24	5.2	0.74	0.1	0.11	0.01	0	3.86	0.77	0.55	2.65	586.52	0.02	0.01	5.29	117	176	36.3	22	118	74	118	30.3	1.6	1.13	10	16	36	88	19.2	5.2	14	10.49	7.35	95.2	497
1	235	1	66	1	11	64	40	25	10	14	13.464	0.59	3286	0.46	3.51	0.68	0.2	0.09	0.01	0.01	2.38	0.77	0.31	0.85	349.27	0.03	0.02	3.52	113	207	36.3	16	125	68	72	21.97	3.17	1.36	6	19	20	75	8.8	2.4	6.4	4.49	5.27	66.9	333
1	236	1	75	1	5	64	32	22	9	10	7.48607	0.58	21515	1.26	9.77	0.84	0	0.08	0	0	8.24	0.73	0.75	8.36	1535.12	0.01	0.04	4.72	136	366	36	20	99	66	100	22.37	0.94	1.36	34	32	34	79	14.6	3.2	11.4	7.02	10.33	66.8	468
1	237	2	86	2	6	62	45	30	11	11	13.701	0.57	400	0.39	7	0.72	0.1	0.09	0.01	0	5.07	1.17	0.65	2.71	719.33	0.09	0.02	5.43	166	177	36.5	19	134	74	89	23.48	0.68	1.56	59	40	59	96	14.2	2.9	11.3	10.93	5.87	69.7	399
1	238	1	87	1	11	59.56	46.02	33.37	9.72	7.56	19.1	0.81	4807.17	1.72	5.87	0.78	0	0.07	0.03	0.01	4.6	0.63	0.41	2.88	1153.65	0.19	0.04	5.41	158	311	36.6	21	148	72	92	22.65	1.38	0.59	24	33	67	104	11.6	7.5	4.1	5.32	5.83	65.5	493
2	239	2	67	1	9	46.82	36.69	27.59	7.73	10.88	7.45	1.23	11330.3	0.56	2.78	0.69	0.2	0.07	0.01	0	1.93	0.63	0.19	0.71	297.16	0.02	0.01	3.21	97	98	36.3	22	117	62	68	15.69	1.46	1.24	13	19	32	181	23.7	6.3	17.4	5.56	13.61	87.2	423
1	240	2	87	1	8	56.76	49.47	30.92	8.86	7.24	19.22	1.11	133.8	0.87	11.36	0.9	0	0.03	0	0	10.26	0.71	0.38	5.38	1791.89	0	0.01	3.73	124	204	36.4	20	90	67	87	25.78	1.79	1.07	14	25	53	96	10.9	3.7	7.2	7.64	3.83	38.6	266.6
2	241	2	76	1	11	67.76	36.93	31.98	13.27	10.46	14.68	0.89	3483.44	0.26	4.42	0.56	0.2	0.15	0.03	0	2.48	1.14	0.64	1.52	278.46	0.15	0.01	4.54	128	163	36.6	20	164	74	74	19.37	1.35	1.32	20	27	23	48	10.3	2.1	8.2	5.93	16.1	140.6	518
1	242	1	85	1	8	49.51	48.76	30.61	13.3	8.11	16.59	1.23	1305.95	0.14	6.68	0.72	0.1	0.11	0.01	0	4.81	1.07	0.72	3.13	651.82	0.06	0.02	5.03	145	142	36.6	20	128	70	64	25.31	1.67	1.17	15	25	19	67	23.3	6.6	16.7	4.82	7.11	95.2	462
1	243	1	82	1	3	63.41	38.96	21.9	9.7	8.77	17.79	1.05	996.41	1.32	5.6	0.7	0.1	0.08	0.02	0.01	3.9	1.06	0.47	1.62	643.87	0.13	0.04	5.28	175	102	36.3	19	145	68	78	23.48	3.22	1.14	9	29	82	116	23.5	6.7	16.8	5.8	5.48	76.1	494
1	244	1	63	1	4	59.98	53.19	30.18	8.05	12.89	10.79	1.25	610.93	3.18	7.05	0.78	0	0.04	0.01	0	5.53	1.19	0.25	1.05	562.29	0.06	0.02	4.01	121	369	36.4	17	204	105	60	23.87	1.94	0.97	17	33	30	140	12	0.5	11.5	6.14	11.95	182	475
1	245	1	62	1	11	52.35	39.84	25.93	7.88	13.29	16.19	0.91	1161.96	0.27	5.56	0.54	0.3	0.08	0.04	0.01	3	1.84	0.45	0.62	171.2	0.21	0.06	3.51	105	246	36.6	17	135	74	71	24.44	1.89	1.14	9	17	23	67	4.9	0.4	4.5	10.22	7.72	97.2	279
1	246	1	83	1	10	71.2	49.42	30.39	13.28	9.16	6.63	1.31	2161.8	2.1	4.3	0.66	0.2	0.06	0.02	0	2.85	1.14	0.26	0.54	275	0.08	0.01	4.11	110	136	36.6	20	113	56	83	22.98	1.25	1.4	20	25	31	88	16.1	2.6	13.5	7.19	5.15	59.8	324
1	247	1	90	1	7	65.77	41.88	29.24	9.08	9.64	13.43	0.52	3494.82	4.5	8.6	0.71	0.18	0.08	0.01	0.01	6.17	1.56	0.7	2.66	668.42	0.12	0.08	5.29	169	137	36.5	22	144	99	95	32.14	1.28	1.33	29	37	57	116	10.2	2.8	7.4	4.84	9.63	93.9	565
2	248	1	69	1	5	65.06	39.89	45.37	7.78	8.6	11.18	1.27	1527.37	2.91	6.56	0.73	0.1	0.08	0.01	0	4.76	1.21	0.53	2.21	727.77	0.04	0.02	6.5	185	163	36.6	20	116	65	82	30.94	1.5	1.05	16	24	45	92	25.1	7.5	17.6	5.98	8.35	122.6	279
1	249	2	75	1	10	63.22	50.04	40.05	14.16	5.38	2.39	1.2	3013.26	0.56	6.65	0.67	0.1	0.09	0.05	0.01	4.47	1.19	0.6	2.14	270.45	0.36	0.03	3.62	72	223	36.2	21	168	78	82	23.42	4.67	1.05	3	14	16	156	7	2.3	4.7	6.05	11.43	120.6	562
2	250	2	80	1	6	75.42	43.16	29.21	8.18	10.75	23.26	1.03	1404.3	0.46	8.03	0.73	0.1	0.08	0.01	0.01	5.83	1.47	0.63	2.63	551.27	0.06	0.04	4.89	139	221	36.5	22	168	100	124	15.58	0.92	1.5	38	35	16	79	10.8	3.1	7.7	5.66	3.76	59.1	282
1	251	2	81	1	5	57.12	56.53	33.44	11.52	12.06	19.89	1.16	5218.71	1.91	5.79	0.66	0.2	0.08	0	0	3.82	1.48	0.46	1.08	335.54	0.01	0.02	3.74	130	181	36.5	20	140	80	80	25.69	2.44	0.98	9	22	22	68	11.8	3.7	8.1	5.12	3.23	48.4	217
1	252	2	57	2	5	62.61	37.71	35.07	8.58	6.74	18.05	0.7	4377.1	2.96	4.69	0.72	0.2	0.05	0.01	0.01	3.37	0.98	0.23	0.68	447.04	0.06	0.05	4.13	130	221	36.2	17	141	98	73	23.89	2.64	1.12	11	29	14	91	13.7	2.3	11.4	10.29	4.72	71.8	375
1	253	1	47	1	8	61.67	41.59	23.37	12.33	12.4	15.18	0.68	351.52	3.08	7.84	0.55	0.3	0.06	0.01	0.01	4.33	2.96	0.44	0.53	190.17	0.07	0.04	4.02	130	202	36.5	18	102	38	55	19.86	4.25	1.31	4	17	11	65	10.8	2	8.8	5.48	6.36	67.8	351
2	254	2	81	1	8	52.41	50.14	29.37	5.88	7.94	10.78	0.97	17927.2	2.78	8.56	0.85	0	0.06	0.01	0.01	7.26	0.67	0.5	5.55	1982.96	0.06	0.07	6.51	183	178	36.3	20	112	72	85	16.47	2	1.18	13	26	18	69	30.1	9	21.1	12.52	10.72	86.1	495
2	255	2	72	2	5	64.07	41.05	29.48	8.37	8.9	16.74	0.72	941.45	1.27	11.43	0.84	0	0.08	0	0	9.64	0.82	0.96	11.42	811.17	0	0.01	2.15	69	127	36	11	104	55	60	19.52	2.67	1.26	9	24	28	53	9.2	2.8	6.4	20.31	19.9	153.5	391
1	256	1	67	1	6	57.17	51.05	36.61	8.37	11.41	9.33	0.67	1466.81	0.88	7.72	0.72	0.1	0.09	0.01	0	5.54	1.37	0.69	2.68	626.79	0.1	0.02	5.27	155	188	36.2	17	107	80	96	23.96	1.37	1.47	19	26	66	74	27.1	5.6	21.5	14.88	9.71	64.8	336
1	257	1	55	1	10	53.52	47.43	25.02	9.18	12.41	10.69	0.53	1474.94	3.01	6.45	0.67	0.2	0.1	0	0	4.34	1.41	0.66	1.92	489.4	0.02	0.02	5.44	159	177	36.6	20	144	72	75	28.03	1.19	1.31	21	25	84	81	16.4	1.9	14.5	12.73	16.33	157.7	439
2	258	1	67	3	7	74.52	49.48	31.6	10.65	9.18	15.28	0.64	1560.1	1.83	1.71	0.72	0.2	0.07	0.01	0	1.23	0.35	0.12	0.55	295.2	0.01	0	2.38	84	34	36.1	17	121	55	89	22.85	1.81	0.75	16	29	22	81	44.9	11.8	33.1	6.37	7.49	80.9	357
1	259	2	72	1	5	67.34	52.44	36.04	10.39	10.22	7.46	0.44	463.76	1.38	9.1	0.65	0.27	0.06	0.02	0.01	5.87	2.48	0.51	1.1	385.81	0.2	0.05	5.33	163	229	36.3	20	234	139	82	23.87	1.12	1.4	25	28	33	73	19.9	4.2	15.7	10.74	6.55	78.1	416
1	260	2	75	1	11	61.16	53.04	21.12	9	7.83	24.27	0.53	733	0.32	6.28	0.63	0.2	0.07	0.01	0.01	3.98	1.75	0.43	0.87	259.27	0.09	0.03	3.98	114	199	36.1	17	123	65	70	28.82	1.79	1.4	14	25	90	88	15.4	4.6	10.8	14.39	7.17	72	293
2	261	2	36	1	4	48.19	42.59	34.34	11.29	10.02	16.49	1.09	1374.02	0.18	6.93	0.58	0.3	0.09	0.01	0.01	4	2.22	0.6	1.21	252.25	0.07	0.04	4.9	140	222	36.2	18	115	78	64	21.86	1.88	1.36	8	15	18	93	23.9	5.7	18.2	5.34	7.74	75.8	595
2	262	1	56	1	8	76.34	50.23	31.84	10.16	10.76	23.25	1.59	236.65	0.82	3.93	0.72	0.1	0.11	0	0	2.84	0.66	0.42	1.94	473.33	0.01	0	3.48	110	72	36.2	19	167	73	57	21.13	1.45	1.5	11	16	21	49	14.8	3.7	11.1	4.66	5.2	82.4	281
1	263	1	89	1	13	58.59	48.52	27.05	14.32	10.58	17.42	1.04	1704.61	4.59	7.6	0.7	0.1	0.09	0.06	0.01	5.35	1.13	0.68	3.11	681.77	0.42	0.05	4.72	144	249	36.6	20	135	78	90	21.6	1.47	1.42	15	22	59	87	17.9	4.8	13.1	5.54	8.13	128.5	391
2	264	1	67	1	5	66.1	41.35	23.92	10.01	6.33	8.04	0.94	343.15	0.32	4.82	0.52	0.3	0.11	0.03	0.01	2.49	1.65	0.51	0.9	276.16	0.13	0.04	6.52	183	158	36.3	21	131	78	89	18.83	1	1.05	21	21	45	84	21.9	5.9	16	6.36	9.66	78	469
2	265	2	77	1	7	59.71	44.18	26.99	9.93	7.41	6.97	0.67	1511.6	0.68	2.8	0.69	0.1	0.1	0.02	0	1.94	0.53	0.27	1.12	662.53	0.06	0.01	4.84	181	50	36.5	23	107	65	84	24.86	2.63	1.38	8	21	11	81	60.7	15	45.7	9.03	7	62.6	453
2	266	2	81	1	6	71.97	50.97	44.17	6.58	9.18	10.55	0.67	1438.44	0.69	7.21	0.76	0	0.05	0.02	0	5.47	1.13	0.38	1.97	789.04	0.16	0.02	4.76	163	100	36.3	21	152	89	89	46.17	1.29	1.18	14	18	21	77	36.5	8.6	27.9	16.5	7.4	88.9	466.4
1	267	1	82	1	5	55.52	40.88	26.81	8.52	13.04	12.53	0.03	1255.01	0.2	5.5	0.81	0	0.08	0	0	4.44	0.6	0.45	3.22	902.8	0.01	0	4.02	122	177	36.4	25	152	78	79	22.61	2	1.04	15	30	97	131	19.3	7.6	11.7	5.79	3.83	56.5	171
2	268	2	65	1	9	65.65	44.18	30.49	14.83	10.35	17.08	1.29	1101.85	1.47	4.2	0.68	0.2	0.05	0.04	0.01	2.82	0.93	0.21	0.77	282	0.17	0.04	3.39	93	211	36.5	16	184	125	99	29.78	1.33	1.21	24	32	52	83	17.4	4.3	13.1	4.8	22.1	536.6	635.9
2	269	1	35	1	7	62.55	40.82	34.72	14.34	11.81	9.99	1.16	1437.79	1.42	9.57	0.63	0.2	0.13	0.04	0	5.99	1.94	1.25	3.99	419.92	0.36	0.03	3.74	136	173	36.5	24	85	48	56	19.39	4.2	0.65	5	21	39	104	17	3.5	13.5	4.54	14.1	122.2	520
2	270	2	73	1	4	63.43	43.37	30.35	10.64	10.31	11.13	1.17	3844.12	0.86	11.92	0.69	0.1	0.11	0.04	0	8.24	1.95	1.25	5.41	667.65	0.43	0.05	4.83	158	262	36.3	16	121	82	103	23.79	0.76	1.13	51	39	115	73	14.9	6.5	8.4	12.03	8.6	100.3	464.1
2	271	2	66	1	11	79.46	66.32	19.34	9.08	12.26	20.5	0.83	533.05	0.6	10.6	0.79	0.16	0.05	0	0	8.37	1.67	0.54	2.84	681.63	0.04	0.02	4.86	136	205	36.2	19	133	86	97	23.68	1.03	1.22	5	14	18	69	21.4	3.2	18.2	6.99	6.6	104.1	480
2	272	2	81	1	7	59.33	50.12	27.73	9.81	3.11	17.98	1.41	167.78	0.21	8.89	0.77	0	0.13	0	0	6.82	0.83	1.16	9.66	1380.43	0.04	0.04	6.32	168	188	36.3	20	128	68	126	35.18	1	1.13	22	22	15	78	17.5	4.2	13.3	8.86	6	55.6	311
2	273	2	86	1	6	71.04	43.08	29.99	7.6	9.52	20.1	1.03	928.95	0.12	7.49	0.73	0.2	0.05	0.01	0	5.45	1.62	0.34	1.27	366.7	0.07	0.01	4.06	109	231	36.4	14	153	63	63	17.55	1.73	0.89	11	19	48	106	8.6	0.2	8.4	18.25	23.53	164	443
2	274	1	78	1	8	62.3	57.75	40.16	5.3	9.9	10.38	1.1	2524.71	7.47	3.2	0.41	0.4	0.07	0.09	0	1.33	1.36	0.23	0.35	141.8	0.3	0.01	4.77	145	167	36.4	17	125	84	62	18.17	2.44	1.33	9	22	19	57	10.2	1.9	8.3	6.81	5.1	56.1	222
2	275	1	44	1	5	60.52	59.34	38.35	5.48	6.67	20.29	1.46	2836.38	1.55	5.03	0.76	0	0.05	0.01	0	3.81	0.92	0.26	1.21	343.73	0.03	0.01	3.94	83	169	36.7	20	168	88	63	23.91	1.44	1.28	18	26	51	100	20	6.3	13.7	7.57	7	82.3	276
2	276	2	80	1	6	55.5	47.9	13.59	9.44	6.96	9.93	0.99	337.59	0.08	13.57	0.43	0.5	0.04	0	0	5.85	7.09	0.6	0.63	134.49	0.01	0.02	5.7	163	137	36.3	20	134	65	84	22.69	2.17	1.06	12	26	44	43	19	4.6	14.4	10.07	9.9	86.6	517
2	277	1	66	1	11	63.76	49.12	42.47	11.25	12.05	14.5	0.83	665.65	3.76	5.2	0.78	0	0.06	0.01	0	4.04	0.79	0.32	1.77	956.3	0.02	0.01	6.46	187	55	36.3	20	127	78	76	31.3	4.22	1.28	9	38	52	130	45	15.9	29.1	5.6	6.6	82.5	771
1	278	2	78	1	6	64.63	50.4	23	9.35	7.9	19.67	1.85	1867.46	0.27	4.5	0.75	0.18	0.05	0.02	0	3.36	0.8	0.23	0.86	718.2	0.07	0.01	8.26	171	145	36.3	19	123	78	91	27.64	0.82	1.71	38	31	58	68	41.4	18.5	22.6	4.67	3.53	53.6	274
1	279	2	56	1	3	71.9	41.66	30.17	9.13	12.78	13.44	1.44	1722.59	0.15	5.1	0.72	0.2	0.07	0	0	3.7	1.07	0.36	1.13	511.78	0	0	4.53	148	134	36.3	23	188	85	136	24.99	1.54	1.29	13	20	18	77	14.3	2.7	11.6	9.11	5.01	66.5	171
2	280	2	50	1	5	54.15	35.19	19.54	15.07	4.27	21.99	1.56	189.25	0.17	5.71	0.7	0.2	0.06	0	0	4	1.33	0.36	1.21	511.28	0.01	0.01	5.66	170	118	36.2	20	150	98	125	23.47	2.88	1.29	16	46	161	188	28.6	12.3	16.3	5.61	6.68	87	482
2	281	2	52	1	6	61.74	39.08	26.22	9.79	6.48	15.7	2.09	5810.28	0.59	4.2	0.57	0.2	0.13	0	0	2.37	1.2	0.56	1.24	339.7	0.01	0.01	5.76	172	121	36.6	20	128	81	79	23.58	1.63	1.16	19	31	149	77	17.1	4.2	12.9	6.39	6	67.2	255
1	282	1	65	1	8	60.42	51.32	36	12.42	7.04	12.81	0.64	2080.67	0.26	4.76	0.83	0	0.06	0	0	3.97	0.49	0.29	2.24	1328.73	0	0.01	5.56	164	101	36.1	21	143	63	91	19.33	2	0.91	11	22	19	36	10.3	2.1	8.2	12.03	17.93	195.5	365
1	283	2	54	1	12	52.57	53.38	25.4	10.39	8.04	17.9	0.86	3381.58	0.28	4.87	0.69	0.2	0.1	0	0	3.35	1.03	0.47	1.42	247.18	0.01	0.01	2.57	76	83	36.2	20	111	66	85	23.96	2.5	1.01	8	20	68	146	14.5	3.1	11.4	5.14	19.53	899.6	300
1	284	2	61	2	4	61.07	45.24	43.67	10.64	8.68	16.72	0.46	3511.51	1.06	3.93	0.56	0.2	0.05	0.1	0.01	2.2	1.1	0.19	0.27	190	0.39	0.05	2.74	95	119	36.2	19	135	83	87	17.93	1.83	0.89	24	44	11	101	6.5	1	5.5	4.96	15.88	207.7	512
1	285	2	79	1	6	70.99	44.09	28	9.41	13.49	10.21	0.94	4891.38	1.58	8.6	0.74	0.15	0.11	0	0	6.35	1.31	0.92	4.35	683.47	0.01	0.01	4.47	141	228	38.1	19	159	83	102	26.67	1.32	1.03	19	25	16	103	15.5	3.9	11.6	6.56	6.33	53.2	281
1	286	1	38	1	7	64.55	50.2	43.82	6.84	6.72	8.99	1.78	955.33	0.32	4.4	0.61	0.2	0.1	0.02	0.01	2.7	1.15	0.45	0.95	272.35	0.07	0.03	4.2	116	259	36.5	21	140	70	63	33.04	1.6	1.13	35	56	52	90	17.3	4.9	12.4	6.52	7.23	69.6	320.2
2	287	2	66	1	6	59.29	47.86	37.12	7.99	11.65	13.74	0.88	1122.97	0.24	6.28	0.64	0.2	0.08	0.02	0.01	4.01	1.65	0.47	1.27	379.13	0.11	0.04	5.19	156	267	36.2	22	132	76	82	24.14	1.2	1.25	15	18	22	102	8.9	2.2	6.7	5.09	4.5	61.5	178
2	288	2	82	1	7	70.77	54	32.2	7.77	7.09	13.24	1.58	5081.09	2.39	1.8	0.81	0	0.03	0	0	1.41	0.29	0.05	0.37	972.41	0	0	6.36	200	116	36.6	17	110	53	48	23.96	1.92	1	12	23	42	75	19.1	4.9	14.2	10.47	15.95	117.4	422
1	289	2	75	1	6	62.87	40.75	34.79	13.46	11.61	14.46	1.55	2081.25	0.19	4.34	0.78	0	0.11	0	0	3.37	0.49	0.47	3.12	811.55	0.01	0	3.8	118	68	36.6	18	119	71	60	22.08	2.83	1.3	6	17	55	62	16.6	4.7	11.9	6.6	13.07	183.6	442
2	290	1	66	1	11	60.38	42.27	54.79	13.67	9.92	21.66	0.61	7454.01	1.17	4.7	0.75	0.1	0.07	0	0.01	3.51	0.81	0.32	1.52	186.33	0.02	0.03	1.54	43	250	36.5	20	120	80	85	24.55	1.6	1.1	10	16	278	168	29.3	10.7	18.6	8.14	6.8	67.8	487
2	291	2	69	2	8	61.73	49.32	36.37	9.92	10.26	11.43	0.94	598.91	1.06	5.4	0.76	0	0.05	0.01	0	4.07	0.94	0.29	1.39	627.82	0.06	0.01	4.46	145	135	36.4	18	123	66	82	25.45	1.28	1.12	18	23	19	73	23.1	7.1	16	18.18	9.9	78.6	223.9
1	292	1	76	1	5	58.58	44.59	34.37	11.82	11.25	18.98	1.24	3011.69	0.57	4.15	0.41	0.4	0.15	0.01	0	1.72	1.77	0.61	0.48	96.2	0.04	0.01	3.7	99	116	36.5	23	162	77	112	26.19	1.36	1.07	14	19	58	134	32.1	14	18.1	7.54	7.23	43.3	401
1	293	2	80	1	4	60.66	37.24	23.43	9.72	9.27	18.7	1.06	1560.27	0.42	6.69	0.78	0	0.1	0	0	5.18	0.85	0.65	3.85	1017.72	0	0.01	5.17	167	335	36.7	19	161	86	64	24.91	0.73	1.2	56	41	64	63	15.7	3.6	12.1	5.02	6.79	50.8	279
1	294	1	36	1	8	57.87	32.48	41.96	14.3	9.9	14.93	1.33	3729.43	0.34	8	0.8	0.13	0.05	0.01	0	6.46	1.04	0.43	2.56	726.75	0.08	0.03	4.99	117	264	36.3	20	163	120	94	36.53	2.83	1.1	6	17	28	106	56.5	15	41.5	5.13	4.46	106.3	672
2	295	1	54	1	8	75.16	44.82	37.41	7.8	7.51	14.61	1.12	12735.2	1.12	24	0.94	0	0.03	0	0	23.27	0.83	0.61	17.23	2999.87	0	0.01	3.5	107	249	36.6	15	97	53	65	18.91	2	0.73	8	16	175	110	6.1	1.1	5	23.53	16.1	171.5	561
2	296	1	84	1	10	58.15	41.27	35.83	13.47	12.14	20.33	0.9	330.48	1.98	5.02	0.63	0.2	0.07	0.01	0.01	3.16	1.44	0.33	0.85	179.94	0.06	0.03	3.29	82	192	36.2	15	105	96	78	26.86	1.25	1.11	20	25	36	100	9.5	1.3	8.2	4.4	6.16	76.7	445
2	297	1	59	1	6	63.76	55.38	18.06	12.56	8.62	15.2	0.83	1077.7	2.72	5.3	0.68	0.1	0.08	0.04	0.01	3.65	1.03	0.42	1.62	676.84	0.23	0.04	7.48	191	117	36.8	18	108	69	68	27.25	1.55	1.37	11	17	49	94	30.4	5.4	25	6.21	6.47	55	386
2	298	2	81	2	5	61.18	45.59	41.02	9.36	15.19	4.68	0.63	12764.4	1.5	5.1	0.69	0.2	0.07	0.03	0	3.52	1.09	0.36	1.29	416.59	0.15	0.01	4.25	129	167	36.5	19	181	114	76	27.82	0.92	1.21	13	12	13	99	8.4	1.6	6.8	6.91	7.03	78.7	383
2	299	2	81	2	5	66.7	50.03	30.67	11.33	6.59	21.06	0.66	149.13	0.41	5.8	0.74	0.2	0.04	0	0	4.32	1.24	0.23	0.93	456.39	0.01	0.01	4.36	131	66	36.5	24	131	66	139	31.79	2.2	1.13	5	11	14	100	20.5	5.5	15	6.19	24.6	151.8	816
1	300	1	71	2	3	58.56	44.02	36.48	10.67	7.74	15.43	1.9	819.42	0.42	6.9	0.74	0.1	0.08	0	0.01	5.17	1.16	0.56	2.39	583.85	0.01	0.03	4.33	131	196	36.3	23	170	107	83	20.12	1.2	1.03	76	91	55	113	28.1	6.9	21.2	6.42	9.56	73	408
1	301	1	71	1	8	58.26	36.65	25.73	9.78	9.65	13.33	0.44	1104.3	0.64	2.3	0.68	0.1	0.1	0.03	0	1.53	0.44	0.22	0.66	257.32	0.06	0.01	2.73	74	63	36.4	18	167	79	74	30.77	3.6	1.23	5	18	21	87	9.9	1.5	8.4	4.69	13.33	492.8	674
1	302	1	72	1	9	72.29	51.76	24.08	9.17	7.7	11.02	0.77	17403.2	0.45	3.9	0.42	0.46	0.09	0.03	0.01	1.62	1.78	0.36	0.22	134.7	0.11	0.02	4.58	148	104	36.3	19	126	68	116	30.72	2.36	1.19	11	26	70	103	19	5.4	13.6	8.83	5.21	66.7	288
2	303	2	47	1	10	66.35	41.69	29.62	8.39	9.89	17.35	1.08	2149.13	0.35	5.5	0.66	0.1	0.13	0.03	0.01	3.62	0.96	0.72	2.85	497.75	0.16	0.04	4.41	132	90	36.4	21	118	58	82	27.63	1.92	1.16	13	25	46	108	25.5	4	21.5	13.4	9.1	103.1	642
1	304	1	86	1	4	53.48	42.46	30.57	7.12	14.71	11.87	1	363.94	1.53	8.09	0.78	0	0.05	0.04	0.01	6.35	1	0.42	2.56	971.55	0.28	0.04	5.22	153	160	36.5	20	146	102	102	27.29	1.23	1.59	22	27	242	97	61	15.3	45.7	4.03	4.43	97.5	503
2	305	2	82	1	5	51.51	38.84	36.31	14.91	4.26	12.31	1.34	1559.81	0.42	2.39	0.76	0	0.04	0.02	0	1.82	0.44	0.09	0.5	219.23	0.04	0	1.69	53	90	36.2	26	139	68	76	23.16	3	1.39	5	15	15	50	50	10.9	39.1	5.78	17.6	312.6	381
2	306	2	62	1	4	66.96	42.38	37.96	9.32	7.98	8.54	1.18	2765.34	0.23	3.22	0.65	0.2	0.1	0.01	0.01	2.09	0.76	0.31	0.98	346.5	0.04	0.02	3.77	126	125	36.3	18	135	72	68	21.06	0.8	1.29	35	28	28	75	12.7	3.1	9.6	4	9.16	69.6	321
1	307	1	77	1	10	51.84	35.55	42.38	11.06	7.87	22.01	1.2	5668.27	2.72	8.11	0.74	0.1	0.04	0.03	0.01	6	1.51	0.35	1.28	520.53	0.22	0.04	4.2	131	196	36.2	23	121	85	104	19.68	1	1.46	18	18	61	101	12.7	2.9	9.8	7.5	4.23	73.7	429
1	308	1	49	1	5	57.63	42.25	22.22	9.27	14.08	10.34	0.2	1175.38	0.36	3.4	0.52	0.3	0.1	0.02	0.01	1.81	1.23	0.34	0.39	148.63	0.06	0.05	4.53	101	108	36.7	20	117	95	43	19.01	2.25	1.49	12	27	15	66	20.5	6.1	14.4	5.26	6.07	66.2	292
2	309	1	34	1	12	57.13	53.72	25.42	9.99	10.11	11.73	1.74	4317.67	0.08	8.17	0.68	0.2	0.08	0.03	0.01	5.59	1.7	0.61	2.14	434.05	0.21	0.06	5.2	132	246	36.1	20	98	53	77	30.25	1.11	1.23	18	20	19	95	15.3	5.2	10.1	7.97	7.4	102.2	480.3
2	310	2	69	1	9	55.62	42.95	35.07	11.46	9.57	20.54	1.38	1993.57	1.59	10.37	0.74	0.1	0.07	0.01	0	7.68	1.89	0.69	2.93	585.14	0.07	0.04	5.01	144	261	36	20	141	67	110	21.9	1.78	1.59	9	16	22	81	13.2	2	11.2	8.52	20.3	141.2	470
1	311	1	52	1	5	60.84	49.55	25.91	12.21	13.14	17.85	0.76	1034.25	1.08	8.76	0.73	0.1	0.07	0.03	0.01	6.39	1.43	0.6	2.57	563.03	0.29	0.05	4.13	126	242	36.2	19	170	92	119	20.54	1.04	0.97	26	27	175	117	9.3	2.3	7	9.09	13.7	248	462
1	312	1	83	2	6	53.82	54.45	35.45	14.27	10.33	13.81	0.76	2910.67	0.76	8.75	0.86	0	0.05	0	0.01	7.49	0.81	0.4	3.59	1128.12	0.01	0.04	3.91	122	202	36.3	18	125	70	76	26.33	0.75	1.06	28	21	32	77	63	8.7	54.3	9.77	8.13	80.9	291.3
2	313	1	82	1	7	77.02	52.24	28.24	13.61	10.59	22.91	2	79687	0.78	5.85	0.82	0	0.07	0	0.01	4.81	0.57	0.42	3.67	1510.51	0.02	0.03	6.21	179	83	36.1	21	120	75	91	23.43	1.57	1.15	30	47	32	84	34.6	10.3	24.3	8.74	10.7	96.2	405
1	314	2	73	1	5	52.91	48.8	31.22	11.62	7.89	17.31	1.5	4444.1	1.81	5.45	0.47	0.4	0.1	0.02	0	2.57	2.22	0.56	0.54	185.23	0.08	0.02	5.18	160	282	36.3	18	124	77	81	19.17	1.79	1.38	19	34	22	81	14.1	5.6	8.5	6.43	4.93	51.2	298.7
2	315	1	64	1	7	44.17	33.6	38.93	9.3	17.03	25.63	1.21	738.58	2.97	5.19	0.52	0.3	0.1	0.02	0.01	2.67	1.85	0.52	0.88	190.51	0.11	0.04	4.11	132	185	36.2	20	137	72	82	21.28	1.43	1.19	37	53	23	103	26.2	16.8	9.4	4.59	9.6	88.3	540.5
1	316	2	75	2	7	62.44	55.8	38.35	9.35	12.8	22.28	1.14	213.46	0.72	9.03	0.73	0.1	0.08	0	0	6.54	1.7	0.74	2.74	569.36	0.03	0.02	4.76	148	181	36.3	17	109	71	93	27.25	1.62	1.51	13	21	22	77	42	6.6	35.4	5.07	11.43	105.9	411
1	317	2	59	1	8	53.98	52.31	23.82	11.22	9.91	14.29	1.07	1544.04	0.32	10.9	0.8	0	0.11	0	0	8.52	0.86	1.19	11.68	931.26	0.01	0.01	3.93	94	63	36.4	21	181	107	111	21.99	1.12	0.9	280	314	78	145	60.8	23.1	37.7	5.08	7.63	72.3	478
2	318	2	65	1	5	80.61	56.44	33.73	14.96	12.21	19.04	0.78	3156.6	0.66	7.07	0.57	0.2	0.16	0.04	0	4.05	1.55	1.16	3.16	279.58	0.29	0.02	3.53	107	167	36.6	17	110	65	72	26.28	2.5	1.33	10	25	13	62	22.3	5.7	16.6	7.82	11.16	122.3	297
2	319	2	79	1	9	67.19	47.85	26.72	8.48	8.81	17.53	1.53	8596	0.17	6.8	0.65	0.2	0.07	0.02	0.01	4.45	1.71	0.51	1.46	445	0.15	0.05	6.16	171	218	36.2	20	137	84	96	24.01	1.67	1	18	30	23	83	16.9	1.9	15	12.5	10.9	113.7	540
2	320	1	48	1	3	58.07	47.81	42.19	9.09	10.09	16.86	0.86	2132.08	0.77	3.7	0.81	0	0.07	0.02	0	2.98	0.38	0.24	2.01	1442.95	0.08	0.01	6.01	184	68	36.6	22	138	91	114	30.66	0.92	1.12	13	12	28	83	8.3	5.1	3.2	14.71	13	146.3	635.7
1	321	2	71	1	7	60.25	49.6	33.97	9.46	13.52	7.57	0.78	13196.8	3.04	2.39	0.76	0	0.04	0.02	0	1.82	0.44	0.09	0.26	219.23	0.04	0	1.69	53	90	36.2	26	139	68	76	23.66	3	1.39	5	15	15	50	50	10.9	39.1	5.39	16.33	308.2	366
1	322	1	56	1	5	62.09	47.53	41.9	8.63	8.41	15.48	0.9	9813.55	1.28	3.22	0.65	0.2	0.1	0.01	0.01	2.09	0.76	0.31	0.74	346.5	0.04	0.02	3.77	126	125	36.3	18	135	72	68	21.56	0.8	1.29	35	28	28	75	12.7	3.1	9.6	3.61	7.89	65.2	306
2	323	2	45	1	12	63.56	52.2	26.75	10.67	7.45	19.19	1.48	3508.48	1.54	8.11	0.74	0.1	0.04	0.03	0.01	6	1.51	0.35	1.52	520.53	0.22	0.04	4.2	131	196	36.2	23	121	85	104	19.18	1	1.46	18	18	61	101	12.7	2.9	9.8	7.89	5.5	78.1	444
2	324	2	66	1	6	69.36	40.37	27.12	8.73	10.02	7.38	0.47	116.81	1.3	3.4	0.52	0.3	0.1	0.02	0.01	1.81	1.23	0.34	0.63	148.63	0.06	0.05	4.53	101	108	36.7	20	117	95	43	18.51	2.25	1.49	12	27	15	66	20.5	6.1	14.4	5.65	7.34	70.6	307
1	325	2	68	1	11	40.06	37.14	40.3	15.21	14.88	16.61	0.79	983.01	0.83	8.17	0.68	0.2	0.08	0.03	0.01	5.59	1.7	0.61	1.9	434.05	0.21	0.06	5.2	132	246	36.1	20	98	53	77	30.75	1.11	1.23	18	20	19	95	15.3	5.2	10.1	7.58	6.13	97.8	465.3
1	326	1	54	1	7	63.39	54.89	30.05	8.84	9.97	19.93	0.28	3503.38	0.26	10.37	0.74	0.1	0.07	0.01	0	7.68	1.89	0.69	2.69	585.14	0.07	0.04	5.01	144	261	36	20	141	67	110	22.4	1.78	1.59	9	16	22	81	13.2	2	11.2	8.13	19.03	136.8	455
1	327	2	79	1	7	69.54	39.7	19.69	11.05	13.32	19.37	1.07	7807.14	0.88	8.75	0.86	0	0.05	0	0.01	7.49	0.81	0.4	3.59	1128.12	0.01	0.04	3.91	122	202	36.3	18	125	70	76	26.33	0.75	1.06	28	21	32	77	63	8.7	54.3	9.77	8.13	80.9	291.3
1	328	2	81	1	3	60.86	53.91	19.13	9.71	7.07	1.55	1.25	2095.5	0.86	5.85	0.82	0	0.07	0	0.01	4.81	0.57	0.42	3.43	1510.51	0.02	0.03	6.21	179	83	36.1	21	120	75	91	23.93	1.57	1.15	30	47	32	84	34.6	10.3	24.3	8.35	9.43	91.8	390
2	329	1	71	1	8	60.6	40.19	19.27	11.07	9.59	17.51	0.96	435.67	0.07	5.45	0.47	0.4	0.1	0.02	0	2.57	2.22	0.56	0.78	185.23	0.08	0.02	5.18	160	282	36.3	18	124	77	81	18.67	1.79	1.38	19	34	22	81	14.1	5.6	8.5	6.82	6.2	55.6	313.7
1	330	1	71	1	9	73.61	60.53	28.51	10.12	14.11	17.13	1.01	1353.67	0.5	3.6	0.83	0	0.06	0.01	0	3.08	0.38	0.24	1.84	826.74	0.02	0.01	3.61	102	63	36.3	17	110	50	49	19.77	2.07	1.32	14	29	46	71	20.5	6.8	13.7	7	9.43	79.4	407
1	331	1	82	3	5	52.02	52.53	28.91	9.38	9.01	15.27	1.56	585.83	0.51	5.19	0.52	0.3	0.1	0.02	0.01	2.67	1.85	0.52	0.64	190.51	0.11	0.04	4.11	132	185	36.2	20	137	72	82	21.78	1.43	1.19	37	53	23	103	26.2	16.8	9.4	4.2	8.33	83.9	525.5
1	332	2	76	2	8	54.31	45.71	34.8	10.32	9.43	12.96	0.63	1708.44	0.82	10.9	0.8	0	0.11	0	0	8.52	0.86	1.19	11.68	931.26	0.01	0.01	3.93	94	63	36.4	21	181	107	111	21.99	1.12	0.9	280	314	78	145	60.8	23.1	37.7	5.08	7.63	72.3	478
1	333	2	72	1	9	67.38	53.13	37.84	12.77	13.98	12.21	1.3	273.85	0.41	7.07	0.57	0.2	0.16	0.04	0	4.05	1.55	1.16	2.92	279.58	0.29	0.02	3.53	107	167	36.6	17	110	65	72	26.78	2.5	1.33	10	25	13	62	22.3	5.7	16.6	7.43	9.89	117.9	282
1	334	2	66	1	9	66.89	51.13	35.74	10.66	10.47	21.37	0.88	177.89	1.64	2.27	0.87	0	0.05	0.01	0	1.97	0.16	0.11	1.24	763.38	0.03	0	1.59	62	20	36.7	27	149	107	117	21.74	1.93	1.39	14	27	8	45	73.1	10.4	62.7	6.37	6.93	83.7	281.5
1	335	1	65	1	9	60.4	50.92	27.07	10.76	5.34	14.93	1.38	2605.91	0.35	6.8	0.65	0.2	0.07	0.02	0.01	4.45	1.71	0.51	1.22	445	0.15	0.05	6.16	171	218	36.2	20	137	84	96	24.51	1.67	1	18	30	23	83	16.9	1.9	15	12.11	9.63	109.3	525
1	336	1	63	1	10	56.76	40.57	25.16	13.56	10.35	22.98	1.75	6657.57	1.2	3.7	0.81	0	0.07	0.02	0	2.98	0.38	0.24	1.77	1442.95	0.08	0.01	6.01	184	68	36.6	22	138	91	114	31.16	0.92	1.12	13	12	28	83	8.3	5.1	3.2	14.32	11.73	141.9	620.7
2	337	1	75	1	6	56.83	46.93	33	11.8	7.38	26.49	0.86	523.23	0.19	5	0.79	0.11	0.09	0	0.01	3.97	0.57	0.46	3.33	794	0.01	0.03	5.31	114	104	36.4	20	150	78	84	25.63	1.8	1.16	15	27	42	69	15.4	4.4	11	6.83	15.69	175.5	679
2	338	2	39	3	5	73.87	41.19	35.47	8.78	11.83	26.22	0.62	712.62	0.25	4.8	0.7	0.2	0.04	0.01	0	3.36	1.19	0.21	0.72	367.06	0.05	0.01	5.02	130	144	36.5	25	118	75	95	24.96	4	0.98	4	16	52	107	43.9	23.3	20.6	8.22	18.97	102.1	633
1	339	2	76	1	5	71.44	40.18	36.86	12.82	14.67	16.86	0.6	1053.77	0.23	4.9	0.71	0.1	0.11	0	0.01	3.49	0.85	0.53	2.07	537.87	0	0.03	4.42	131	129	36.4	16	120	88	52	24.8	1.85	1.54	26	48	16	68	11.7	3.2	8.5	8.17	4.34	55.6	227
1	340	1	72	1	4	61.59	47.11	29.7	5.39	9.93	26.81	0.75	12297.7	0.7	4.9	0.75	0.1	0.09	0.02	0.01	3.66	0.71	0.42	2.06	231.97	0.08	0.03	2.14	45	197	36.7	27	131	60	77	27.14	2.29	1.28	7	16	21	164	13	2.7	10.3	5.56	7.63	113	508
1	341	1	68	1	7	58.65	39.67	36.65	7.94	10.87	17.29	1.32	869.68	0.72	7.96	0.92	0	0.02	0	0	7.32	0.43	0.19	3.12	2400.28	0	0.02	4.6	141	120	36.5	29	121	65	99	24.18	1.05	1.14	41	43	21	62	23.9	7.7	16.2	15.99	10.82	91.7	424
1	342	1	71	1	5	60.34	40.93	28.65	7.88	8.24	15.72	0.24	951.41	2.67	5.7	0.61	0.25	0.13	0	0	3.49	1.43	0.76	1.74	361.2	0.01	0.02	4.41	148	112	36.1	20	177	97	95	23.42	1.63	1.14	16	26	68	62	20	5.8	14.2	5.17	5.77	93.2	328
1	343	1	73	1	14	64.58	44.16	29.99	6.53	11.41	17.07	0.26	2530.84	2.4	6.84	0.84	0	0.07	0	0	5.71	0.65	0.47	4.02	1537.31	0.01	0	5.25	175	120	36.4	24	122	62	74	26.65	1.5	1.22	12	18	15	71	26.7	8.1	18.6	7.71	6.63	53	454
2	344	2	51	1	5	58.61	38.58	41	4.34	13.14	13.9	1.05	2129.13	0.29	6.8	0.64	0.2	0.07	0.01	0	4.37	1.93	0.45	1.15	382.66	0.07	0.02	5.71	169	157	36.2	18	112	79	63	22	1.17	1.29	30	35	21	93	10.4	3.3	7.1	6.44	7.69	77.9	353
1	345	2	81	1	12	59.79	43.51	29.93	9.19	7.84	22.43	0.93	586.85	0.74	7.4	0.61	0.31	0.06	0.02	0	4.48	2.3	0.44	0.75	276.59	0.11	0.02	4.73	142	226	36.2	16	125	83	71	27.86	2.07	1.05	15	31	174	179	12.7	0.5	12.2	5.64	12.85	94.3	473
1	346	2	87	1	4	66.03	53.85	31.48	10.41	11.43	9.34	0.62	3148.8	1.67	8.6	0.75	0.17	0.08	0	0	6.44	1.47	0.68	2.87	832.38	0	0.01	6.32	190	155	36.3	20	94	69	71	34.85	1	1.46	23	23	38	50	40.1	10.1	30	6.3	5.83	91.6	518
2	347	2	76	2	4	68.42	38.44	35.11	10.38	6.36	16.9	1.21	165.53	0.89	6.99	0.68	0.2	0.07	0	0	4.73	1.75	0.48	1.43	405.43	0.02	0.01	4.92	150	205	36.6	16	115	76	75	21.1	1.53	1.38	17	26	26	79	15.5	3.7	11.8	4.87	11.1	93.9	366.1
1	348	1	44	1	6	70.76	47.96	36.17	11.2	12.95	15.52	1.4	1515.24	2.98	3.44	0.66	0.1	0.14	0.03	0	2.27	0.59	0.48	1.74	515.56	0.09	0.01	4.8	134	105	36.5	20	101	67	81	20.74	1.38	1.31	32	44	66	83	18.1	3	15.1	4.57	14.78	134.5	537
1	349	1	78	1	5	55.58	39.07	21.59	12.38	9.35	7.92	0.6	757.6	0.27	6.4	0.68	0.2	0.1	0.01	0.01	4.37	1.32	0.65	2.04	460.17	0.04	0.03	4.2	139	221	36.6	22	116	57	91	20.28	2.07	1.1	14	29	127	145	11.8	2.7	9.1	5.15	5.95	77.3	348
2	350	1	87	1	3	49.07	47.16	22.62	8.47	7.26	15.87	1.52	1404.15	1.45	7.6	0.63	0.2	0.1	0.02	0.01	4.82	1.84	0.74	2.07	403.41	0.17	0.06	4.61	154	395	36.5	16	95	63	76	21.16	3.63	1.08	8	29	26	56	30.6	6	24.6	6.14	8.32	80.6	467
2	351	1	48	1	7	64	42.4	31.34	13.13	13.31	15.9	1.19	948.26	0.56	7.5	0.85	0	0.07	0.01	0	6.36	0.57	0.53	6.04	1037.68	0.06	0.01	3.19	93	182	36.6	22	116	57	91	17.06	0.91	1.21	33	30	31	112	10.1	2.2	7.9	7.39	23.08	276.9	603
2	352	1	82	1	7	63.11	45.77	29.73	10.01	12.71	12.21	1.24	5968.27	0.35	6.1	0.83	0	0.04	0.01	0.01	5.07	0.69	0.27	2.11	529.04	0.05	0.04	2.13	72	130	36.5	19	119	93	59	28.83	0.93	1.16	27	25	45	77	8.3	1.7	6.6	7.46	25.09	192.4	685
2	353	2	77	4	7	61.53	36.13	33.11	8.78	8.69	10.17	1.69	7620.39	1	7.37	0.89	0	0.07	0	0	6.52	0.32	0.53	10.93	1283.63	0	0	2.66	63	123	36.2	28	83	51	58	27.35	2.25	1.2	4	9	38	60	13.4	6.6	6.8	11.25	21.5	215.7	722
1	354	2	80	1	8	67.67	60.2	32.6	12.05	15.16	17.98	1.01	135.22	5.6	8.1	0.71	0.2	0.05	0.02	0.01	5.7	1.74	0.42	1.27	442.24	0.14	0.05	4.39	135	186	36.5	17	155	74	60	26.97	2.38	1.28	8	19	15	85	17.4	2.2	15.2	9.44	6.79	121.8	458
1	355	2	87	1	7	67.92	54.49	38.66	10.17	10.03	14.18	0.86	11044.6	0.22	10.75	0.7	0.2	0.09	0.01	0	7.54	2.18	0.95	3.18	560.31	0.05	0.03	5.39	162	260	36.5	21	142	100	87	25.07	0.88	1.67	17	15	13	71	14.7	3.5	11.2	6.12	4.13	62.2	379
1	356	2	75	1	8	66.35	44.85	20.8	11.51	9.32	12.24	0.85	1250.85	0.69	5.75	0.72	0.1	0.13	0.01	0.01	4.16	0.77	0.73	3.83	772.57	0.04	0.05	4.89	143	138	36.3	20	119	70	99	26.38	1.04	1.27	28	29	80	80	36.8	5.5	31.3	4.02	7.03	65.9	480.6
1	357	2	66	1	8	51.05	51.01	26.58	11.46	13.05	11.77	0.81	167.91	0.64	6.1	0.8	0.14	0.05	0.01	0	4.88	0.85	0.29	1.55	700.42	0.03	0.02	4.33	122	214	36.4	4	140	69	84	33.69	2	1.65	13	26	21	112	9.6	2.2	7.4	6.57	6.09	76.9	222
1	358	2	45	1	6	68.6	46.57	43.72	6.44	12.38	14.44	1.41	746.24	3.42	3.89	0.7	0.2	0.05	0.01	0	2.74	0.92	0.18	0.43	428.87	0.04	0.01	4.35	144	101	36.6	17	136	82	66	25.56	1.04	1.78	24	25	21	80	13.9	3.9	10	3.93	4.32	69.3	186
1	359	1	69	1	6	56.39	58.96	28.35	8.98	13.58	19.88	1.14	1565.72	0.5	13.6	0.85	0	0.05	0	0	11.44	1.41	0.68	5.41	1062.87	0.01	0.01	4.42	131	503	36.5	19	117	68	109	22.98	1.04	0.71	48	50	39	120	8.4	0.9	7.5	15.32	9.63	73.5	374
1	360	1	56	1	8	67.77	41.23	29.69	12.42	7.07	15.8	1.2	11741.9	0.2	5.89	0.83	0	0.1	0	0	4.88	0.41	0.6	7.03	1106.93	0	0	3.13	93	155	36.5	18	96	60	75	19.83	1.71	1.01	14	24	16	89	7.4	5.6	1.8	7.5	17.73	190.4	499.5
1	361	2	79	1	14	65.99	58.48	33.47	9.6	6.94	20.88	0.75	3755.49	1.31	6.2	0.7	0.1	0.11	0.02	0.01	4.36	0.97	0.7	3.04	413.53	0.14	0.03	3.44	92	206	36.4	24	102	57	84	25.12	1.75	1.15	12	21	76	86	13.4	4.5	8.9	9.9	8.33	85.7	224
1	362	2	88	1	8	54.93	38.58	28.12	12.27	15.64	12.92	0.61	12510	3.45	4.5	0.71	0.2	0.07	0.01	0	3.18	0.9	0.33	1.06	318	0.06	0.01	4.47	90	258	36.7	27	107	67	77	24.52	1.26	1.71	27	34	58	68	14.9	3.8	11.1	5.29	7.01	70.3	322
1	363	2	45	2	8	65.28	48.86	31.63	10.44	6.85	20.41	1.28	917.44	1.32	6.12	0.74	0.1	0.06	0.02	0	4.54	1.09	0.38	1.47	624.77	0.1	0.01	5.14	150	183	36.1	16	133	77	65	27.64	1.08	1.21	26	28	77	101	11.1	0.4	10.7	7.83	11.27	89.9	539
1	364	1	76	1	10	65.6	46.7	23.2	12.11	11.71	15.31	1.08	1335.48	0.25	4.6	0.7	0.2	0.06	0.03	0	3.17	0.96	0.25	0.72	323.6	0.16	0.01	3.75	98	26	36.6	20	134	64	93	17.99	1.33	0.98	15	20	37	131	12.8	4.4	8.4	11.14	7.73	48.7	250.8
1	365	1	78	1	7	62.02	41.24	29.7	11.26	10.98	21.21	0.94	1695.22	1.98	8.62	0.7	0.1	0.1	0.04	0	6.04	1.38	0.83	3.52	713.42	0.34	0.03	5.68	163	170	36.3	20	111	62	110	20.33	1.06	1.25	66	70	18	69	14	2.8	11.2	2.9	6.03	66.5	205.1
2	366	2	76	2	6	54.31	40.83	32.41	12.07	7.97	14.63	0.94	748.78	0.27	5.5	0.62	0.28	0.08	0.02	0.01	3.37	1.54	0.41	1.03	262.6	0.1	0.05	6.4	120	221	36.2	20	98	63	98	29.1	1.67	1.27	12	20	7	72	22.2	3.8	18.4	12.06	12.1	93.7	424.5
1	367	1	67	1	4	65.28	34.65	27.55	13.43	11.79	15.65	0.29	1628.55	11.67	13.2	0.91	0.07	0.03	0	0	12	0.86	0.33	4.49	2065.12	0	0.02	5.04	148	166	36.3	20	163	120	94	24.52	1.75	1.51	16	28	47	75	4.4	3.9	0.5	3.6	4.43	81.7	418.7
1	368	2	88	1	4	52.46	44.3	41.28	9.85	10.53	25.37	1.05	2026.52	1.17	5.27	0.78	0	0.1	0	0.01	4.11	0.61	0.51	3.33	855.69	0.01	0.03	4.53	127	176	36.4	20	93	70	98	24.75	1.41	1.02	34	48	58	77	16.1	5.1	11	4.24	8.53	117.9	511.5
1	369	1	64	3	5	61.97	46.87	28.32	9.96	9.83	14.52	1.77	50250.6	0.53	6.9	0.84	0	0.1	0	0	5.74	0.41	0.68	9.41	2422	0.03	0.03	5.33	173	172	36.3	23	102	81	113	18.68	1.5	1.23	10	15	38	92	12.6	1.3	11.3	5.74	5.14	55.8	217
1	370	2	76	1	6	58.72	49.01	24.49	11.12	8.31	28.89	1.55	487.73	1.36	4.82	0.76	0	0.08	0.02	0	3.65	0.67	0.37	1.91	724.55	0.11	0.02	4.21	133	86	36.6	22	107	71	86	24.79	1.48	1.22	21	31	258	204	31.1	8.8	22.3	4.78	7.33	60.2	385.6
1	371	1	64	1	9	68.23	58.12	23.06	12.1	10.46	5.98	1.34	480.4	10.37	4.1	0.65	0.2	0.07	0.02	0	2.66	1.01	0.3	0.68	279.17	0.09	0.02	3.63	106	161	36.3	20	107	63	82	28.07	2.67	1.3	6	16	10	66	10.6	2.4	8.2	4.26	12.41	136.8	380
1	372	2	81	1	5	58.94	46.47	36.31	15.76	8.83	22.22	1.35	6058.82	0.27	8.13	0.68	0.2	0.09	0	0	5.54	1.82	0.74	2.14	401.8	0.02	0.01	4.27	132	289	36.5	20	131	81	81	23.86	0.89	1.25	118	105	85	174	9.5	1.8	7.7	4.58	7.33	59.9	238
1	373	1	87	1	3	63.17	48.19	25.79	11.39	7.26	13.87	1.49	84.96	1.52	4.3	0.65	0.2	0.1	0.01	0.01	2.79	1.02	0.41	1.01	325.5	0.05	0.04	3.76	119	218	36.3	23	85	59	73	20.22	2.75	0.92	8	22	25	103	17.5	5.2	12.3	3.6	3.59	60.8	289
2	374	2	53	1	5	46.43	53.31	37.85	10.99	9	12.63	1.21	429.39	0.64	6.02	0.84	0	0.07	0.01	0.01	5.03	0.51	0.39	3.98	1479.41	0.05	0.04	4.72	150	63	36.6	23	144	89	120	23.63	1.63	0.98	19	31	26	153	14.3	5.3	9	5.99	7.52	91.6	417
2	375	1	75	1	6	60.8	44.01	26.98	7.94	11.2	18.47	0.96	14429.9	0.34	7.2	0.79	0	0.05	0	0	5.65	1.12	0.35	1.9	438.88	0.02	0.02	2.88	87	146	36.7	24	211	104	107	25.51	1.5	0.63	14	21	15	50	4.6	1.3	3.3	6.87	67.59	1681.5	1032
1	376	2	74	1	6	76.97	43.86	19.54	10.72	6.94	7.98	0.75	2517.78	1.24	7.1	0.65	0.2	0.05	0.03	0.01	4.59	1.88	0.37	0.79	400.4	0.19	0.04	5.96	164	207	36.4	18	120	83	73	33.63	1.91	1.17	11	21	31	109	9.8	2.4	7.4	5.24	4.74	56.4	363
2	377	1	77	1	5	63.17	54.82	23.34	12.41	11.48	12.65	0.98	444.29	1.67	7.47	0.72	0.1	0.09	0.01	0.01	5.36	1.3	0.69	2.97	482.4	0.08	0.04	5.04	117	230	36	20	130	80	70	20.91	2.5	0.93	10	25	20	111	34.6	12.4	22.2	5.73	15.93	163.1	692
1	378	2	89	1	4	49.47	44.54	36.2	12.19	9.28	14.64	0.71	9580.9	1.47	3	0.75	0.1	0.08	0	0	2.27	0.51	0.24	0.96	654.29	0	0.01	4.44	147	68	36.6	22	123	75	91	23.14	1.21	1.12	24	29	22	63	16.1	2.4	13.7	9.17	5.73	103.1	265
1	379	2	71	1	6	58.47	49.67	17.91	8.28	13.75	16.5	0.68	1698.69	3.74	4.9	0.56	0.2	0.12	0.06	0	2.73	1.26	0.6	1.19	292.5	0.3	0.01	4.19	135	98	36.2	19	104	59	72	22.13	1.83	1.38	12	22	18	54	9.1	2.3	6.8	5.28	5.09	41.6	154
2	380	1	72	5	6	60.83	51.46	30.37	12.03	5.09	17.1	0.6	2436.45	3.4	4.2	0.74	0.1	0.07	0.01	0.01	3.11	0.71	0.31	1.49	473.07	0.04	0.02	4.36	108	205	36	20	157	69	70	20.63	2.38	0.76	8	19	12	89	9.6	2	7.6	5.59	6.2	80.3	370
1	381	1	72	1	7	53.33	45.09	28.56	9.79	9.59	7.93	0.73	2875.38	0.21	5.6	0.78	0	0.08	0.01	0	4.4	0.74	0.46	2.63	802.7	0.03	0.01	4.41	135	125	36.2	18	114	50	47	22.27	1.86	0.89	37	69	61	114	9	3.7	5.3	7.37	8.61	119.1	390
2	382	1	82	1	8	72.37	46.07	28.44	8.72	12.16	14.1	0.27	140.59	1.47	3.6	0.84	0	0.07	0	0	3.05	0.32	0.25	2.51	1448.75	0.01	0	4.74	152	61	36.5	23	147	78	83	19.33	2.88	1.22	8	23	16	109	30.6	8.2	22.4	9.82	9.48	61.2	340
1	383	2	77	1	7	60.12	40.03	38.35	7.92	7.65	5.52	1.67	1365.12	0.29	6.75	0.74	0.1	0.13	0	0	4.99	0.89	0.86	4.71	829.8	0	0.01	4.97	148	117	36.5	25	136	71	85	29.82	1.71	1.13	7	12	11	68	9	2.5	6.5	6	14.34	145.1	428
2	384	1	67	2	3	48.01	45.65	32.16	12.09	9.01	14.29	1.07	11195.7	3.68	4.57	0.64	0.2	0.09	0.01	0	2.9	1.22	0.39	1.06	287.62	0.04	0.02	4.26	121	113	36.2	22	146	85	70	30.66	1.12	1.45	49	55	45	78	18.7	5.6	13.1	4.96	13.15	79.8	462
1	385	2	81	1	3	52.41	42.8	26.32	11.95	7.11	13.91	0.5	400.62	0.65	5.74	0.87	0	0.07	0	0	4.97	0.35	0.41	5.71	2825.8	0	0.01	6.49	199	90	36.6	20	152	98	82	25.1	1.67	1.26	21	35	11	54	18	2.4	15.6	6.49	8.33	73.8	374.7
1	386	2	64	2	11	66.8	49.42	28.45	10.06	6.4	19.73	1.61	740.28	5.1	5.74	0.87	0	0.07	0	0	4.97	0.35	0.41	5.71	2825.8	0	0.01	6.49	199	90	36.6	20	152	98	82	25.1	1.67	1.26	21	35	11	54	18	2.4	15.6	6.49	8.33	73.8	374.7
1	387	1	57	1	9	52.2	44.62	27.09	9.52	6.71	14.74	1.48	14253.8	17.25	3.7	0.83	0	0.07	0.01	0.01	3.04	0.33	0.27	2.38	1022.55	0.02	0.02	3.71	111	83	36.8	20	121	91	127	22.02	1.11	1.67	35	39	58	95	34.3	10.5	23.8	5.08	3.23	58.5	204
1	388	2	46	1	2	50.46	59.31	27.45	7.36	13.67	12.43	1.13	476.76	0.32	7.19	0.67	0.2	0.08	0.01	0.01	4.83	1.65	0.57	1.56	477.15	0.1	0.04	5.57	163	209	36.3	20	172	114	93	26.67	1.36	1.34	25	34	44	88	12.5	4.9	7.6	4.31	11.63	215.3	477
1	389	2	67	1	4	49.6	34.65	39.93	9.31	4.98	19.01	0.54	1124.46	0.74	6.7	0.61	0.3	0.07	0.02	0.01	4.11	2	0.46	0.84	230.16	0.12	0.04	4.04	112	210	36.6	20	126	74	89	29.71	0.75	1.26	67	50	47	70	8.6	0.7	7.9	4.55	5.13	56.7	307
1	390	2	65	1	9	72.11	42.95	40.53	10.37	10.22	14.14	1.29	160.6	0.5	3.9	0.66	0.2	0.08	0.02	0	2.57	0.88	0.33	0.85	405.94	0.08	0.02	4.56	139	190	36.2	20	104	67	64	32.71	1.69	1.39	13	22	23	53	11.8	2.8	9	6.49	5.65	64.2	228
1	391	1	76	1	6	62.04	48.77	29.4	8.32	10.08	10.78	1.08	70106.8	1.2	8.58	0.74	0.1	0.1	0.02	0.01	6.36	1.17	0.84	4.46	1157.85	0.15	0.06	7.06	213	226	36	20	103	73	100	14.83	1.48	1.48	25	37	26	65	22.4	3.4	19	5.16	9.63	59.8	451.5
1	392	2	78	4	11	61.47	42.96	30.83	10.51	14.29	18.38	0.96	1584.32	1.6	6.05	0.64	0.2	0.11	0	0.01	3.89	1.43	0.68	1.74	473.33	0.02	0.03	5.32	174	133	36.2	16	184	99	92	30.78	1.94	1.21	16	31	24	72	21	4.2	16.8	18.28	6.53	82.8	317
1	393	1	81	1	5	65.41	31.78	29.56	12.42	9.92	8.42	1.76	6377.7	1.07	7.7	0.82	0	0.07	0	0.01	6.28	0.83	0.53	3.9	1709.98	0	0.05	8.58	226	174	36.1	19	152	101	98	38.88	2.73	1.06	11	30	66	84	18.6	12.3	6.3	4.71	7.23	41.4	86
2	394	1	76	1	9	58.25	43.9	39.44	9.84	8.43	14.74	1.05	5817.62	1.57	11.91	0.81	0	0.11	0	0	9.67	0.93	1.29	13.54	1372.52	0	0.02	4.72	132	140	36.5	19	93	64	76	13.13	1.58	0.99	19	30	29	90	19.2	6.2	13	6.69	10.21	49.8	658
2	395	2	52	1	8	71.71	45.12	24.29	10.59	16.21	20.86	0.85	2347.94	0.28	6.27	0.81	0	0.07	0.03	0	5.09	0.58	0.42	3.82	509	0.17	0.01	1.99	58	280	36.3	22	128	67	78	31.05	1.05	0.75	39	41	169	313	6.7	0.8	5.9	10.85	32.15	164.1	864
1	396	1	43	2	6	60.7	45.33	31.17	8.2	9.67	6.23	1.3	428.41	0.34	5.84	0.61	0.2	0.08	0.05	0.01	3.58	1.49	0.45	0.97	177.8	0.27	0.05	2.39	74	143	36.5	25	124	76	105	20.02	2.5	1	8	20	16	36	5.5	0.3	5.2	6.25	17.73	456.2	369
1	397	2	49	1	8	52.48	53.45	29.02	12.72	6.34	22.85	1.35	1322.84	0.07	9.31	0.81	0	0.11	0.01	0	7.57	0.66	1	11.36	1800.74	0.06	0.02	5.05	157	84	36.5	20	132	68	80	30.77	0.83	1.09	29	24	39	97	14.9	3.5	11.4	5.86	3.27	83.1	286
2	398	2	86	1	12	70.68	53.54	31.36	9.74	8.13	17.22	1.84	19794.9	1.46	4.2	0.54	0.4	0.04	0.01	0	2.23	1.7	0.15	0.33	125.93	0.06	0.02	3.95	96	281	36.6	20	113	62	96	27.44	1.58	1.22	12	19	15	65	8.4	2.4	6	6.07	7.23	59	301
2	399	2	66	1	7	59.09	57.49	33.44	10.19	8.79	15.44	2.15	8005.25	1.5	7.1	0.86	0	0.06	0	0	6.11	0.57	0.41	4.52	1854.44	0.01	0.01	5.84	173	156	36.4	24	110	52	74	27.23	1	1.321	27	27	158	153	17.1	5.4	11.7	10.3	6.26	64.9	354
1	400	1	81	5	4	65.71	49.89	32.7	6.49	9.9	25.44	0.46	2758.57	0.23	3.7	0.62	0.3	0.07	0.01	0	2.29	1.1	0.26	0.43	247.74	0.02	0.02	3.66	119	129	36.3	23	144	94	93	26.16	1.07	1.51	108	116	44	79	9.3	2.1	7.2	5.03	6.68	99.6	288
1	401	1	54	1	7	52.09	51.01	36.53	9.8	12.89	19.89	0.57	4904.98	0.38	3.43	0.73	0.1	0.09	0.02	0	2.49	0.59	0.29	1.11	692.14	0.05	0.01	5.22	164	76	36.3	21	136	82	90	28.66	0.59	1.4	37	22	86	65	14.6	2.1	12.5	5.2	4.44	90.9	266
1	402	1	52	3	5	62.6	48.87	15.71	11.68	12.36	17.27	0.14	2583.22	1.34	8.78	0.84	0	0.04	0	0	7.35	1.04	0.36	2.43	876.35	0.01	0.02	3.78	124	170	36.7	20	148	73	73	25.69	0.65	1.19	17	11	22	80	6.6	1.8	4.8	18.98	25.3	304.7	618
2	403	2	74	1	11	55.64	44.46	28.87	11.86	11.27	13.35	0.55	4992.82	2.55	5.5	0.8	0	0.04	0	0	4.37	0.85	0.23	1.31	750.61	0.01	0.01	4.44	146	150	36.3	20	93	59	75	14.52	1.73	1.68	15	26	18	121	25.5	1.8	23.7	7.16	9.8	74.2	335.5
1	404	2	71	1	8	57.92	48.19	38.96	7.59	6.58	5.88	1.35	5071.87	0.25	8.86	0.7	0.2	0.07	0.01	0	6.22	1.91	0.63	1.94	309.37	0.08	0.02	3.36	95	427	36.4	20	122	78	74	22.34	0.56	1.01	36	20	10	107	4.7	0.6	4.1	5.79	15.59	288.9	348
1	405	1	67	1	14	49.41	51.07	37.36	10.85	12.48	21.28	0.76	4021.7	2.39	4.67	0.66	0.1	0.16	0.03	0	3.09	0.64	0.76	3.56	400.73	0.16	0.02	3.34	83	146	36.3	20	101	57	59	17.45	0.71	0.98	167	118	176	154	19.5	11.2	8.3	6.34	39.13	211.7	1014.3
1	406	1	66	1	4	73.57	54.73	41.87	8.2	9.78	17.27	0.63	435.41	1.53	6.66	0.64	0.2	0.05	0.01	0	4.27	1.95	0.36	0.68	413.86	0.06	0.02	6.31	189	126	36.2	25	135	92	98	27.71	0.96	1.33	45	43	29	63	30.8	5	25.8	11.32	6.83	94.1	351
1	407	2	36	1	5	66.76	43.35	41.47	9.18	8.54	10.72	0.35	432.44	0.3	6.72	0.6	0.2	0.12	0.01	0	4.06	1.78	0.78	1.67	342.13	0.08	0.02	4.61	150	189	36	20	120	92	75	24.99	0.41	1.73	124	51	102	102	21.9	6.9	15	4.57	4.96	89.2	422
1	408	1	25	1	5	59.49	46.8	15	13.52	11.2	17.24	0.87	649.09	0.68	7.1	0.7	0.1	0.1	0.01	0	5.01	1.36	0.71	2.51	515.74	0.06	0.03	5.03	140	243	36.2	22	97	59	88	20.96	3.57	1.13	7	25	35	163	43.1	11.5	31.6	5.25	9.37	65.4	504
2	409	1	82	1	5	62.67	44.66	30.94	11.2	8.27	19.43	2.01	466.2	0.21	7.2	0.88	0.07	0.05	0	0	6.37	0.47	0.39	5.42	1789.02	0.01	0	4.29	132	135	36.2	18	132	98	78	20.89	3	1.28	6	18	56	73	38.9	6.7	32.2	9.78	10.58	103.7	455
1	410	1	70	1	7	61.77	43.79	33.52	7.51	13.29	23.08	1.53	10875.1	41.21	6.6	0.55	0.3	0.06	0	0	3.6	2.57	0.37	0.41	183.5	0.01	0.02	4.24	131	324	36.3	20	153	85	112	35.46	1.56	1.19	27	42	100	114	23.1	4.4	18.7	6.12	5.64	55.4	488
2	411	1	33	1	9	67.4	34.88	45.21	8.04	12.09	24.17	1	3820.98	0.65	5.2	0.65	0.2	0.08	0.01	0.02	3.4	1.3	0.43	1.25	253.69	0.05	0.08	4.89	97	221	36.2	20	127	82	71	27.53	1.39	1.29	18	25	33	71	21.5	0.9	20.6	4.8	6.7	75.9	394.1
1	412	2	83	1	6	52.89	55.4	29.21	9.74	12.64	13.42	1.2	6277.38	0.36	2.5	0.74	0.1	0.06	0	0.01	1.84	0.45	0.16	0.54	130.84	0.01	0.03	1.85	32	165	36.7	18	121	55	90	26.19	2.17	1.9	6	13	11	85	28.3	7	21.3	4.8	2.81	55.1	332
1	413	2	62	1	3	59.56	42.24	34.77	7.91	10.75	9.64	1.33	1781.79	0.36	4.4	0.75	0.1	0.07	0.01	0.01	3.21	0.72	0.28	1.14	610.79	0.06	0.03	4.63	137	128	36.6	23	185	105	87	26.01	1.26	2.19	23	29	32	92	15.8	2.9	12.9	5.28	10.7	117.5	423
2	414	1	72	1	9	58.68	53.83	42.07	10.54	10.42	14.66	1.47	869.18	1.03	8.3	0.78	0	0.05	0.01	0	6.53	1.31	0.44	2.32	727.77	0.05	0.01	5.21	146	159	36.3	17	108	67	62	20.12	1.65	1.02	20	33	140	162	25	3.1	21.9	9.86	13	57.9	403.4
2	415	1	53	2	7	64.4	38.59	34.49	6.45	7.87	15.97	0.94	576.66	0.2	5.4	0.69	0.1	0.07	0.04	0.01	3.74	1.05	0.37	1.45	434.55	0.23	0.03	4.15	122	179	36.6	20	172	89	69	26.25	2.11	1.38	9	19	28	118	9.1	1.5	7.6	7.49	12.65	153.2	449
2	416	1	66	1	5	68.77	36.34	22.35	7.26	8.28	15.88	0.53	1193.56	0.8	4.13	0.62	0.2	0.08	0.02	0.01	2.54	1.13	0.34	0.89	314.69	0.09	0.03	4.41	140	138	36.7	20	105	59	88	25.08	1.36	1.5	28	38	52	80	13.4	2.8	10.6	5.15	11.39	73.3	464
1	417	1	64	1	12	65.44	53.63	28.97	7.95	13.51	9.66	0.98	8031.76	0.2	10.5	0.92	0	0.03	0	0	9.6	0.52	0.32	5.8	1975.38	0.01	0.02	3.37	107	200	36.3	18	138	86	79	26.25	2.86	0.87	7	20	19	86	16.1	2.7	13.4	13.89	7.92	87.3	376
2	418	1	87	1	5	54.71	40.39	27.39	10.8	6.99	18.54	0.68	1594.84	0.56	7.24	0.65	0.2	0.05	0.01	0	4.72	2.13	0.33	0.86	345.69	0.04	0.02	4.9	156	200	36.2	20	94	61	65	25.15	1.57	1.56	14	22	17	55	11.9	0.7	11.2	5.86	8.6	68.3	269
2	419	1	47	1	12	69.84	37.4	41.02	5.59	11.52	17.57	1.35	2530.13	2.21	15.72	0.73	0.1	0.09	0.03	0.01	11.54	2.34	1.33	6.69	759.47	0.42	0.09	4.73	154	222	36.4	24	107	71	94	25.17	1.38	0.89	21	29	27	62	27.5	6.8	20.7	6.97	9.4	101.3	331
2	420	2	76	1	10	58.95	57.33	31.93	10.14	8.57	20.67	0.98	1384.1	1.46	6.4	0.63	0.3	0.06	0.01	0	4.06	1.92	0.41	1	348.91	0.03	0.01	5.2	165	111	36.2	22	136	75	126	25.19	0.32	1.39	163	52	213	90	25.5	4.3	21.2	6.22	11.1	81.6	435.4
1	421	1	31	1	7	59.26	54.64	20.3	7.96	6.49	10.44	0.57	264.3	0.2	5.7	0.58	0.31	0.09	0.01	0.01	3.35	1.78	0.51	0.85	348.17	0.04	0.04	7.2	185	245	36.2	20	116	80	72	31.04	2.67	1.61	9	24	13	66	19.6	3.7	15.9	4.12	5.43	77.9	509
2	422	1	50	1	19	53.46	47.34	30.33	10.84	9.36	10.68	0.79	1586.03	0.16	3.53	0.71	0.1	0.07	0.02	0	2.51	0.68	0.26	1.09	180.87	0.08	0	1.06	49	70	36.3	19	164	76	86	25.83	1.62	1.93	13	21	20	64	29.7	8.1	21.6	5.78	15.02	182.8	617
2	423	1	70	1	7	57.78	47.38	35.87	8.62	6.3	10.69	1.46	5770.62	0.41	5.9	0.95	0	0.02	0	0	5.34	0.21	0.09	2.42	4094	0	0	4.49	161	122	36.4	16	126	72	79	23.39	0.86	1.44	745	640	214	122	20.3	6	14.3	13.93	9.65	84.8	430
2	424	1	48	1	6	61.59	51.44	37.5	9.82	15.26	19.3	1.01	223.9	0.74	6.9	0.74	0.2	0.04	0.01	0	5.04	1.44	0.29	1.15	532	0.06	0.02	4.76	152	208	36	19	115	81	102	19.18	0.67	1.47	84	56	140	116	20	4	16	5.08	7.98	101.5	195
1	425	2	86	1	3	70.67	52.94	24.42	11.88	14.74	15.44	1.24	1123.54	1.39	6.59	0.68	0.2	0.06	0.04	0	4.49	1.38	0.41	1.22	344.88	0.29	0.02	3.33	106	198	36.2	20	157	94	80	27.85	1.33	1.73	15	20	39	111	12.7	1.7	11	5.42	15.23	377	586
2	426	2	86	2	2	62.31	55.13	28.19	12.21	12.11	11.66	0.73	1039.9	2.44	4.48	0.55	0.3	0.11	0	0	2.47	1.51	0.5	0.95	181.57	0	0	3.68	111	125	36.3	21	159	84	88	19.8	2.29	0.77	21	48	396	266	23.8	11.4	12.4	4.13	6.3	54.7	362
2	427	1	84	1	6	64.87	52.15	25.86	9.32	12.45	11.85	0.59	976.43	1.24	4.31	0.48	0.4	0.07	0.02	0	2.06	1.85	0.32	0.49	134.74	0.07	0.01	4.26	121	105	36	17	157	85	67	22.57	1.23	1.38	26	32	13	103	19.4	1	18.4	5.24	7.8	64.5	301.2
1	428	1	84	1	11	61.85	36.29	35.35	11.05	7.34	6.33	1.24	2537.97	0.37	6.4	0.75	0.18	0.06	0	0	4.8	1.17	0.39	1.49	627.69	0.01	0	4.71	153	211	36.2	22	137	68	110	27.03	0.39	1.78	66	26	32	54	26.4	5.3	21.1	4.28	11.33	79.5	372
1	429	2	85	1	5	65.58	44.43	24.7	10.7	8.44	7.11	1.57	14224.1	2.06	8.09	0.57	0.3	0.07	0.01	0.01	4.6	2.83	0.58	0.83	318.59	0.04	0.04	6.33	196	163	36.5	18	141	91	78	25.3	2.6	1.18	30	78	48	166	20.6	4.3	16.3	5.15	4.73	81.2	242
1	430	1	72	1	4	54.89	40.28	28.84	8.31	17	17.16	0.62	12937.5	0.72	3.7	0.62	0.21	0.17	0.01	0	2.29	0.76	0.61	1.73	229	0.02	0.01	2.42	76	124	36.6	20	116	78	78	20.13	1.3	1.1	9	12	35	90	48.1	22	26.1	5.67	10.73	115	532.9
1	431	2	77	1	5	56.33	38.75	39.56	10.73	12.72	9.82	0.87	623.44	0.42	8.92	0.82	0	0.06	0	0.02	7.29	0.9	0.57	4.51	947.7	0.03	0.13	4.8	117	341	36.7	24	150	83	107	42.82	1.36	1.14	14	19	16	85	56.3	20.2	36.1	4.85	4.53	65.9	427.7
1	432	1	65	1	10	54.68	53.67	31.28	7.92	7.3	16.4	1.71	2085.64	1.43	7.75	0.64	0.25	0.07	0.03	0.01	4.94	1.96	0.56	1.3	488.96	0.24	0.05	6.34	194	141	36	20	167	71	70	22.79	1.04	1.21	27	28	32	68	14	3.3	10.7	6.78	8.08	74.1	477
1	433	2	82	1	10	62.24	35.83	34.9	9.44	7.73	22.43	1.26	6409.1	0.1	5.86	0.65	0.2	0.11	0.02	0.01	3.8	1.22	0.66	1.95	436.07	0.14	0.04	4.81	140	239	36.3	17	103	62	71	19.86	2.27	1.22	11	25	17	102	7	1.7	5.3	4.99	3.94	44.8	207
1	434	2	83	1	5	50.86	46.25	26.41	12.36	6.79	15.18	1.01	1188.71	0.46	7.7	0.7	0.2	0.08	0.01	0	5.4	1.63	0.58	1.81	553.25	0.09	0.02	5.2	167	192	36.2	18	86	50	74	27.25	1.04	1.5	24	25	19	71	11.9	5.7	6.2	7.87	9.43	88.8	299
1	435	2	83	3	5	70.18	41.4	27.4	12.05	10.86	12.26	0.7	5923.51	0.31	7.49	0.75	0.1	0.12	0	0	5.64	0.88	0.93	5.85	807.55	0.02	0.02	4.57	126	171	36.2	25	108	86	78	18.64	1.48	0.69	21	31	38	74	14.8	6.3	8.5	4.74	7.51	80.1	165
2	436	1	81	1	5	71.6	56.58	25.52	9.33	10.37	24.19	0.48	1472.31	2.3	5.3	0.74	0.2	0.05	0	0	3.96	1.05	0.29	1.22	418.63	0.02	0.02	3.83	111	135	36.6	23	153	106	106	18.47	2.21	0.72	24	53	35	174	6.8	1.1	5.7	3.39	15.3	178.2	326
2	437	2	81	1	10	56.98	49.27	31.97	12.93	15.66	11.81	0.79	6095.83	0.41	5.5	0.64	0.3	0.04	0	0	3.48	1.72	0.23	0.6	228.63	0.02	0.02	3.36	113	190	36	20	140	95	50	25.58	5	1.12	3	15	14	85	9.8	2.5	7.3	11.37	14.1	142.3	340
1	438	2	85	2	13	62.89	56.65	29.17	7.91	12.13	10.32	1.21	7917.18	0.58	3.9	0.6	0.2	0.11	0.01	0	2.35	1.11	0.41	0.76	315.45	0.02	0.01	4.64	149	136	36.2	20	99	57	138	18.64	1.05	1.14	22	23	47	53	7.6	5	2.6	5.32	7.93	77.3	246.5
1	439	2	75	2	5	67.25	55.02	30.13	8.51	8.61	14.72	1.3	35317.8	2.97	2.6	0.68	0.1	0.13	0.02	0	1.78	0.46	0.35	1.24	479.83	0.04	0.01	4.53	124	207	36.3	22	80	64	75	18.26	2	1.07	13	26	125	297	29.8	19.5	10.3	6.87	5.73	64.8	233.4
1	440	2	87	1	6	57.13	36.03	39.55	15.65	7.87	8.91	0.67	577.05	0.9	5.44	0.59	0.2	0.08	0.04	0.01	3.23	1.53	0.45	0.84	323	0.2	0.03	4.62	153	149	36.3	19	132	90	60	25.39	2.71	1.23	7	19	13	90	30.6	5.7	24.9	4.42	4.22	72.5	345
1	441	1	80	1	6	63.47	34.4	30.88	10.39	10.16	22.37	1.34	539.56	0.9	7.6	0.53	0.3	0.04	0.04	0	4	2.96	0.3	0.3	167.57	0.3	0.03	4.35	124	190	36.4	17	144	88	68	35.46	0.94	1.43	18	17	15	52	10.3	1.5	8.8	3.93	3.73	48.4	411
1	442	1	82	1	11	66.31	46.08	36.64	7.9	12.08	8.72	0.8	3689.05	0.59	7.3	0.72	0.2	0.06	0.01	0.01	5.26	1.52	0.42	1.34	574.45	0.06	0.04	5.6	166	155	36.2	22	112	83	111	39.29	1.03	0.99	29	30	56	62	41.7	10.3	31.4	5.12	2.71	71.7	439
1	443	1	85	1	14	50.18	40.15	27.5	11.36	15.57	13.31	0.04	1372.17	0.39	7	0.81	0	0.06	0.02	0.01	5.68	0.76	0.41	2.95	620.32	0.12	0.05	4.49	83	272	36.3	20	141	69	95	39.36	2.33	1.79	6	14	30	79	30.5	5.3	25.2	7.23	9.5	99.1	697
1	444	1	78	1	6	71.71	56.17	45.51	10.05	7.93	13.43	1.4	497.27	0.41	6.78	0.63	0.2	0.09	0.01	0	4.24	1.89	0.58	1.19	323.05	0.05	0.02	4.39	144	162	36.4	19	161	90	90	23.19	1.56	1.15	32	50	16	109	15.8	3.2	12.6	5.96	5.6	70.6	385
1	445	2	52	1	4	74.11	44.83	33.53	12.34	14.03	15.6	0.39	7591	1.99	2.76	0.72	0.1	0.1	0.02	0	2	0.43	0.27	1.15	572.09	0.05	0.01	4.13	123	165	36.5	17	138	70	59	22.79	3.46	0.77	13	45	65	146	12.5	2.8	9.7	4.73	4.43	53	347
1	446	2	82	4	7	62.35	34.57	32.92	12.64	10.44	20.36	1.08	676.18	2.73	4.11	0.57	0.3	0.06	0.01	0.01	2.36	1.45	0.24	0.28	242.51	0.04	0.02	4.94	149	122	36.2	17	90	65	40	19.66	0.99	1.4	76	75	57	91	20.3	4.5	15.8	6.42	8.11	87.2	368
1	447	2	79	1	10	70.55	50.01	36.51	8.66	8.22	16.82	1.04	1769.17	1.09	6.51	0.82	0	0.06	0.01	0	5.35	0.71	0.39	2.83	1047.39	0.04	0.02	4.52	139	201	36	17	132	88	72	26.65	2.27	1.52	11	25	16	65	20.2	3.9	16.3	5.78	4.29	91.5	337
1	448	2	84	1	10	61.13	37.68	26.83	7.71	4.38	13.54	1.75	389.53	3.36	4.2	0.68	0.2	0.05	0.01	0.01	2.86	1.05	0.22	0.49	370.44	0.03	0.03	4.1	136	98	36.1	20	154	80	100	27.42	2.09	1.32	11	23	24	78	30.1	5.5	24.6	11.38	6.88	57.8	335
1	449	1	85	1	5	60.65	48.2	32.5	12.5	12.16	19.7	1.16	776.87	0.17	7.43	0.67	0.1	0.1	0.03	0.01	4.98	1.41	0.76	2.57	434.43	0.24	0.04	4.28	123	133	36.3	18	113	65	85	21.11	1.35	1.14	60	81	84	125	14.9	3.9	11	6.07	8.03	67.5	391.5
1	450	2	82	1	4	65.94	43.05	49.07	13.42	10.97	11.55	1.01	1158.48	0.35	6.7	0.68	0.2	0.05	0.01	0	4.59	1.71	0.32	0.75	394.58	0.09	0.03	4.71	147	196	36.1	17	120	73	77	18.14	1.9	1.07	10	19	13	60	20.4	4.1	16.3	5.02	8.51	67.1	300
1	451	1	80	2	7	55.65	41.38	27.88	9.62	9.67	20.82	1.07	1576.11	0.65	4.67	0.66	0.17	0.11	0.06	0.01	3.06	0.8	0.5	1.8	543.15	0.27	0.04	4.93	142	263	36.3	20	148	87	64	24.07	0.8	1.05	15	12	50	89	5.7	1.7	4	6.79	19.34	314	491
2	452	2	85	1	3	51.62	52	28.91	8.74	6.04	7.34	0.72	462.39	0.16	3.45	0.8	0	0.04	0.01	0	2.76	0.5	0.14	0.9	651.36	0.04	0.01	3.98	118	113	36.1	18	86	62	75	18.9	1.11	1.33	28	31	58	78	12.3	3	9.3	5.33	7.77	69.6	277
1	453	2	89	1	6	59.83	40.08	20.2	9.09	8.56	18.29	1	693.01	0.51	6.3	0.77	0	0.08	0	0	4.93	0.9	0.52	2.74	821.67	0.01	0.01	4.52	150	122	36.7	13	125	80	92	27.64	0.68	1.26	244	166	60	94	109.9	25.8	84.1	7.85	10.92	140.2	823
1	454	2	64	1	8	57.94	40.98	16.92	10.4	8.73	13.61	0.44	244.99	3.11	10	0.92	0	0.02	0	0	9.66	0.62	0.2	3.01	2056.65	0.01	0	4.07	132	273	36.2	18	111	54	66	27.35	0.83	1.07	35	29	12	69	7.3	1.5	5.8	6.55	10.16	57.7	153
2	455	1	67	1	7	56.86	48.79	17.71	10.03	9.3	6.69	1.24	349.36	0.21	12.7	0.81	0	0.07	0.02	0.01	10.35	1.06	0.94	9.31	732.31	0.27	0.11	3.4	75	836	36.2	18	101	62	96	16.45	2.88	0.83	8	23	25	55	19	4.9	14.1	5.56	8.64	78.9	334
2	456	1	49	2	8	70.1	39.31	37.37	8.3	6.92	15.11	0.81	8721.47	2.71	3.9	0.76	0	0.06	0.01	0	2.98	0.64	0.24	1.25	433.03	0.04	0.02	2.92	93	100	36.4	18	87	55	92	20.61	2.38	0.5	13	31	10	95	17.4	8.7	8.7	9.61	14	182.2	730
1	457	1	76	1	8	60.83	32.66	23.55	14.71	8.07	17.27	1.97	556.9	0.2	2.01	0.64	0.2	0.06	0	0	1.25	0.57	0.12	0.15	302.63	0	0	4.3	138	103	36.6	16	135	72	47	22.34	1.67	1.31	18	30	65	81	11	1.2	9.8	8.12	5.04	44.9	234
1	458	2	84	2	6	58.54	49.12	26	8.39	7.25	11.43	1.22	218.13	4.27	6.61	0.69	0.2	0.07	0.02	0	4.57	1.44	0.48	1.41	476.04	0.11	0.01	4.71	150	265	36.1	20	137	77	99	23.16	1.67	1.35	18	30	13	69	13.6	1.8	11.8	9.36	7.34	113.2	472
2	459	1	81	1	5	45.23	42.07	21.04	10.69	11.81	19.06	1.11	2917.71	1.61	8.1	0.69	0.1	0.11	0	0	5.6	1.53	0.92	3.5	658.82	0.02	0.03	7.51	180	145	36.6	26	109	70	86	25.92	1.03	1.19	34	35	94	90	18.7	1.8	16.9	5.25	9.5	73.7	278.9
2	460	2	86	1	11	58.62	48.65	34.44	8.74	9.04	10.41	0.56	6098.94	0.37	5.2	0.76	0	0.07	0	0	3.95	0.89	0.34	1.64	710.11	0	0.02	7.46	160	180	36.3	22	155	75	95	32.26	3	1	8	24	15	132	17.3	5.5	11.8	5.63	8.31	66.1	425
2	461	1	67	1	10	58.86	55.69	32.28	8.05	6.69	17.31	0.45	1759.96	5.02	6.8	0.65	0.28	0.07	0	0.01	4.44	1.87	0.46	1.22	353.78	0.01	0.03	4.2	149	134	36.3	81	113	81	81	19.74	1.19	1.43	36	43	96	104	34.6	0.1	34.5	6.19	14.5	83.5	368.7
[truncated: 105 more columns]
